# Supplementary material for: Pseudoscientific beliefs and psychopathological risks increase after COVID-19 social quarantine
Source: Springer Nature journal article supplement (doi:10.1186/s12992-020-00603-1), 2020-07-30

# ASGS

## Australian Sheep-Goat Scale

Escala Australiana de Ovejas-Cabras  
o Creencias Paranormales

Michael A.  
Thalbourne

### Adaptación española:

Álex Escolà-Gascón  
Lance Storm

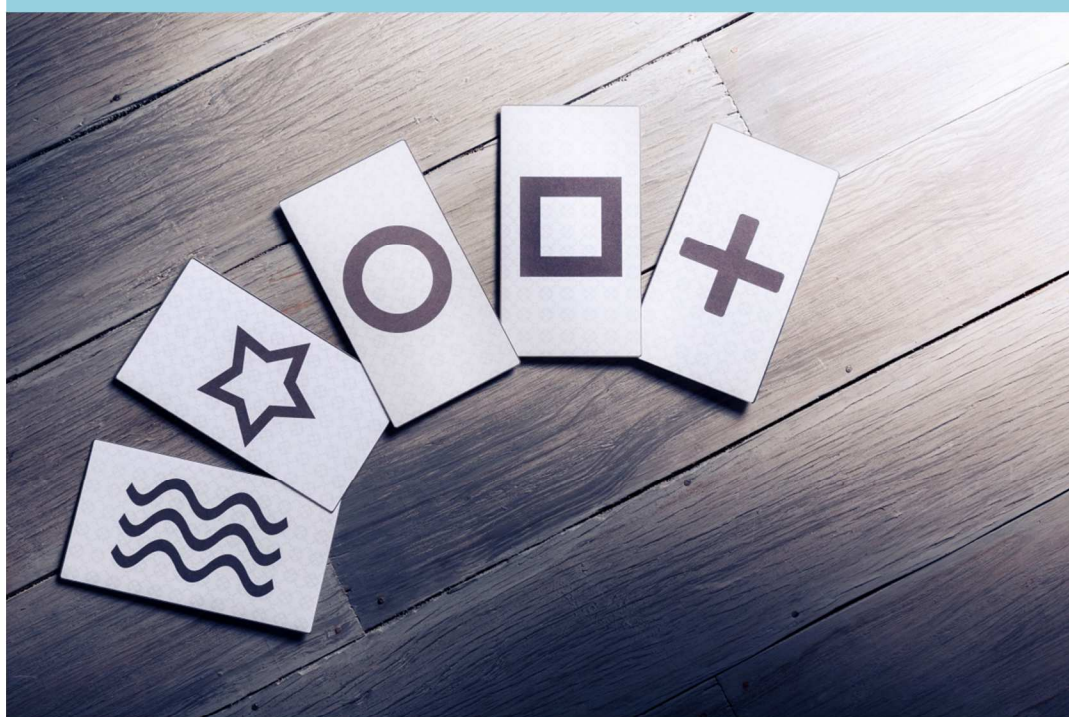

Cuadernillo y hojas  
de respuesta en español

**Spanish Test Booklets  
and answer sheets**

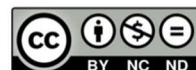

# ASGS

## Australian Sheep-Goat Scale

Escala Australiana de Ovejas-Cabras o *Creencias Paranormales*

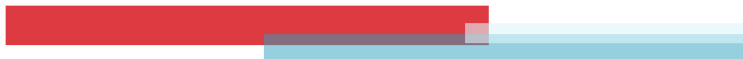

Localidad  Fecha de hoy  /  /  Sexo:  Hombre  Mujer Antecedentes psiquiátricos:  Sí  No

Nivel educativo:  Educación Primaria  Educación Secundaria Obligatoria (ESO)  Formación Profesional  Bachillerato o Módulos Superiores  
 Estudios universitarios, máster o doctorados

NO ESCRIBA NADA EN ESTAS CASILLAS

¿Cree Vd. en la existencia de lo paranormal?  Sí  No  No lo sé

ID  Observaciones

### INSTRUCCIONES

Señale sus respuestas con una cruz en las casillas ubicadas al final de cada enunciado. Marque **V** cuando **considere ciertos los contenidos** de cada frase; Indique **¿?** cuando no **entienda la pregunta**. Tenga en cuenta que algunos conceptos pueden ser técnicos o excesivamente específicos para Vd. cuando se encuentre en esta situación, le pedimos que marque esta alternativa; y señale **F** cuando **considere falsos los contenidos** de la frase. Gracias por su colaboración. Si ha entendido las instrucciones puede comenzar.

|                                                                                                                                                                                                     | V                        | ¿?                       | F                        |
|-----------------------------------------------------------------------------------------------------------------------------------------------------------------------------------------------------|--------------------------|--------------------------|--------------------------|
| 1. Creo en la existencia de la percepción extrasensorial (PES).....                                                                                                                                 | <input type="checkbox"/> | <input type="checkbox"/> | <input type="checkbox"/> |
| 2. Creo que he tenido una experiencia personal de PES.....                                                                                                                                          | <input type="checkbox"/> | <input type="checkbox"/> | <input type="checkbox"/> |
| 3. Creo que soy psíquico o médium.....                                                                                                                                                              | <input type="checkbox"/> | <input type="checkbox"/> | <input type="checkbox"/> |
| 4. Creo que es posible adquirir información de una situación del futuro antes de que ésta ocurra, que no dependa de la predicción racional o los canales sensoriales normales.....                  | <input type="checkbox"/> | <input type="checkbox"/> | <input type="checkbox"/> |
| 5. He tenido alguna vez una corazonada que se hizo realidad y que no se debió a una coincidencia.....                                                                                               | <input type="checkbox"/> | <input type="checkbox"/> | <input type="checkbox"/> |
| 6. He tenido alguna vez una premonición acerca del futuro que fue verdadera y que no fue una coincidencia.....                                                                                      | <input type="checkbox"/> | <input type="checkbox"/> | <input type="checkbox"/> |
| 7. He tenido alguna vez un sueño que fue verdadero y que no fue una coincidencia.....                                                                                                               | <input type="checkbox"/> | <input type="checkbox"/> | <input type="checkbox"/> |
| 8. He tenido alguna vez una visión que no era una alucinación y de la cual he recibido información que no pude haber tenido en ningún otro momento ni en ningún otro lugar.....                     | <input type="checkbox"/> | <input type="checkbox"/> | <input type="checkbox"/> |
| 9. Creo que hay vida después de la muerte.....                                                                                                                                                      | <input type="checkbox"/> | <input type="checkbox"/> | <input type="checkbox"/> |
| 10. Creo que algunas personas pueden conectarse con los espíritus de los muertos.....                                                                                                               | <input type="checkbox"/> | <input type="checkbox"/> | <input type="checkbox"/> |
| 11. Creo que es posible adquirir información de los pensamientos, sentimientos o circunstancias de otras personas, que no dependa de la predicción racional o los canales sensoriales normales..... | <input type="checkbox"/> | <input type="checkbox"/> | <input type="checkbox"/> |
| 12. Creo que es posible enviar un «mensaje mental» a otra persona, o influir de alguna manera a otro a distancia, por medio de otros canales de comunicación.....                                   | <input type="checkbox"/> | <input type="checkbox"/> | <input type="checkbox"/> |
| 13. Creo que he tenido alguna vez una experiencia de telepatía con otra persona.....                                                                                                                | <input type="checkbox"/> | <input type="checkbox"/> | <input type="checkbox"/> |
| 14. Creo que la mente puede influir sobre un sistema físico, sin la mediación de energía física conocida.....                                                                                       | <input type="checkbox"/> | <input type="checkbox"/> | <input type="checkbox"/> |
| 15. Estoy convencido de que en alguna ocasión mi mente ha influido sobre un sistema físico, sin la mediación de energía física conocida.....                                                        | <input type="checkbox"/> | <input type="checkbox"/> | <input type="checkbox"/> |
| 16. Creo que poseo habilidades psíquicas para influir sobre un sistema físico, sin la mediación de energía física conocida.....                                                                     | <input type="checkbox"/> | <input type="checkbox"/> | <input type="checkbox"/> |
| 17. Creo que en alguna ocasión un evento físico inexplicable (pero no persistente) ha ocurrido en mi presencia.....                                                                                 | <input type="checkbox"/> | <input type="checkbox"/> | <input type="checkbox"/> |
| 18. Creo que algunas perturbaciones físicas persistentes e inexplicables, han ocurrido en mi presencia alguna vez en el pasado (p. ej. un poltergeist).....                                         | <input type="checkbox"/> | <input type="checkbox"/> | <input type="checkbox"/> |

\*Designed by Álex Escolà-Gascón

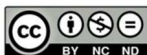

Supplement: MOESM1 [file 18233066]
