# Supplementary material for: Pseudoscientific beliefs and psychopathological risks increase after COVID-19 social quarantine
Source: Global Health. 2020 Jul 30;16:72. doi: 10.1186/s12992-020-00603-1 (PMC7391050; doi:10.1186/s12992-020-00603-1)
Supplement: Supplementary file 2 — Additional file 2. [file 12992_2020_603_MOESM2_ESM.jasp]

Archive with 49 entries (49 files):
- META-INF/MANIFEST.MF
- metadata.json
- xdata.json
- data.bin
- index.html
- analyses.json
- resources/0/state
- resources/0/_20.png
- resources/0/_21.png
- resources/0/_22.png
- resources/0/_23.png
- resources/0/_24.png
- resources/0/_25.png
- resources/0/_26.png
- resources/0/_27.png
- resources/0/_28.png
- resources/0/_29.png
- resources/0/_40.png
- resources/0/_41.png
- resources/0/_42.png
- resources/0/_43.png
- resources/0/_44.png
- resources/0/_45.png
- resources/0/_46.png
- resources/0/_47.png
- resources/0/_48.png
- resources/0/_49.png
- resources/1/jaspResults.json
- resources/1/state
- resources/1/_10.png
- resources/1/_11.png
- resources/1/_12.png
- resources/1/_13.png
- resources/1/_14.png
- resources/1/_15.png
- resources/1/_16.png
- resources/1/_17.png
- resources/1/_18.png
- resources/1/_19.png
- resources/1/_20.png
- resources/1/_21.png
- resources/1/_22.png
- resources/1/_23.png
- resources/1/_24.png
- resources/1/_25.png
- resources/1/_6.png
- resources/1/_7.png
- resources/1/_8.png
- resources/1/_9.png
