# Supplementary material for: Pseudoscientific beliefs and psychopathological risks increase after COVID-19 social quarantine
Source: Global Health. 2020 Jul 30;16:72. doi: 10.1186/s12992-020-00603-1 (PMC7391050; doi:10.1186/s12992-020-00603-1)
Supplement: Supplementary file 2 — Additional file 2. [file 12992_2020_603_MOESM2_ESM.jasp › analyses.json]

{
   "analyses" : [
      {
         "id" : 0,
         "module" : "T-Tests",
         "name" : "TTestPairedSamples",
         "options" : {
            "VovkSellkeMPR" : false,
            "descriptives" : true,
            "descriptivesPlots" : true,
            "descriptivesPlotsConfidenceInterval" : 0.950,
            "effSizeConfidenceIntervalCheckbox" : false,
            "effSizeConfidenceIntervalPercent" : 0.950,
            "effectSize" : true,
            "hypothesis" : "groupsNotEqual",
            "meanDiffConfidenceIntervalCheckbox" : false,
            "meanDiffConfidenceIntervalPercent" : 0.950,
            "meanDifference" : false,
            "missingValues" : "excludeAnalysisByAnalysis",
            "normalityTests" : true,
            "pairs" : [
               [ "Level_paranormal_beliefs_PRE", "Level_paranormal_beliefs_POST" ],
               [ "Level_MMSI_R_Pva_PRE", "Level_MMSI_R_Pva_POST" ],
               [ "Level_MMSI_R_Pt_PRE", "Level_MMSI_R_Pt_POST" ],
               [ "Level_MMSI_R_Po_PRE", "Level_MMSI_R_Po_POST" ],
               [ "Level_MMSI_R_Pg_PRE", "Level_MMSI_R_Pg_POST" ],
               [ "Level_MMSI_R_Pc_PRE", "Level_MMSI_R_Pc_POST" ],
               [ "Level_MMSI_R_Et_PRE", "Level_MMSI_R_ET_POST" ],
               [ "CAPE42_1_HAL_PRE", "CAPE42_1_HAL_POST" ],
               [ "CAPE42_2_NEGATIVE_PRE", "CAPE42_2_NEGATIVE_POST" ],
               [ "CAPE42_3_DEP_PRE", "CAPE42_3_DEP_POST" ]
            ],
            "plotHeight" : 300,
            "plotWidth" : 350,
            "students" : true,
            "welchs" : false,
            "wilcoxonSignedRank" : true
         },
         "progress" : null,
         "results" : {
            ".meta" : [
               {
                  "name" : "title",
                  "type" : "title"
               },
               {
                  "name" : "ttest",
                  "type" : "table"
               },
               {
                  "meta" : [
                     {
                        "name" : "shapiroWilk",
                        "type" : "table"
                     },
                     {
                        "name" : "levene",
                        "type" : "table"
                     }
                  ],
                  "name" : "assumptionChecks",
                  "type" : "object"
               },
               {
                  "meta" : [
                     {
                        "name" : "descriptivesTable",
                        "type" : "table"
                     },
                     {
                        "meta" : "image",
                        "name" : "descriptivesPlots",
                        "type" : "collection"
                     }
                  ],
                  "name" : "descriptives",
                  "type" : "object"
               }
            ],
            "assumptionChecks" : {
               "shapiroWilk" : {
                  "cases" : [],
                  "data" : [
                     {
                        ".isNewGroup" : true,
                        "W" : 0.9459220293212430,
                        "p" : 3.496639407148900e-06,
                        "sep" : "-",
                        "v1" : "Level_paranormal_beliefs_PRE",
                        "v2" : "Level_paranormal_beliefs_POST"
                     },
                     {
                        ".isNewGroup" : false,
                        "W" : 0.8954884153869840,
                        "p" : 9.918798608292079e-10,
                        "sep" : "-",
                        "v1" : "Level_MMSI_R_Pva_PRE",
                        "v2" : "Level_MMSI_R_Pva_POST"
                     },
                     {
                        ".isNewGroup" : false,
                        "W" : 0.8905717358397840,
                        "p" : 5.167266551350900e-10,
                        "sep" : "-",
                        "v1" : "Level_MMSI_R_Pt_PRE",
                        "v2" : "Level_MMSI_R_Pt_POST"
                     },
                     {
                        ".isNewGroup" : false,
                        "W" : 0.9244935066731610,
                        "p" : 7.342565104640060e-08,
                        "sep" : "-",
                        "v1" : "Level_MMSI_R_Po_PRE",
                        "v2" : "Level_MMSI_R_Po_POST"
                     },
                     {
                        ".isNewGroup" : false,
                        "W" : 0.9163144694292730,
                        "p" : 1.993499829656650e-08,
                        "sep" : "-",
                        "v1" : "Level_MMSI_R_Pg_PRE",
                        "v2" : "Level_MMSI_R_Pg_POST"
                     },
                     {
                        ".isNewGroup" : false,
                        "W" : 0.9368423571284510,
                        "p" : 6.220727640663580e-07,
                        "sep" : "-",
                        "v1" : "Level_MMSI_R_Pc_PRE",
                        "v2" : "Level_MMSI_R_Pc_POST"
                     },
                     {
                        ".isNewGroup" : false,
                        "W" : 0.7924221019479060,
                        "p" : 1.912289146333330e-14,
                        "sep" : "-",
                        "v1" : "Level_MMSI_R_Et_PRE",
                        "v2" : "Level_MMSI_R_ET_POST"
                     },
                     {
                        ".isNewGroup" : false,
                        "W" : 0.8886408057805490,
                        "p" : 4.020474663665340e-10,
                        "sep" : "-",
                        "v1" : "CAPE42_1_HAL_PRE",
                        "v2" : "CAPE42_1_HAL_POST"
                     },
                     {
                        ".isNewGroup" : false,
                        "W" : 0.9540290333367990,
                        "p" : 1.871148777961400e-05,
                        "sep" : "-",
                        "v1" : "CAPE42_2_NEGATIVE_PRE",
                        "v2" : "CAPE42_2_NEGATIVE_POST"
                     },
                     {
                        ".isNewGroup" : false,
                        "W" : 0.9731002829488030,
                        "p" : 0.001874457350272350,
                        "sep" : "-",
                        "v1" : "CAPE42_3_DEP_PRE",
                        "v2" : "CAPE42_3_DEP_POST"
                     }
                  ],
                  "footnotes" : [
                     {
                        "cols" : null,
                        "row" : null,
                        "symbol" : "<em>Note.</em>",
                        "text" : "Significant results suggest a deviation from normality."
                     }
                  ],
                  "schema" : {
                     "fields" : [
                        {
                           "name" : "v1",
                           "title" : "",
                           "type" : "string"
                        },
                        {
                           "name" : "sep",
                           "title" : "",
                           "type" : "separator"
                        },
                        {
                           "name" : "v2",
                           "title" : "",
                           "type" : "string"
                        },
                        {
                           "format" : "sf:4;dp:3",
                           "name" : "W",
                           "title" : "W",
                           "type" : "number"
                        },
                        {
                           "format" : "dp:3;p:.001",
                           "name" : "p",
                           "title" : "p",
                           "type" : "number"
                        }
                     ]
                  },
                  "title" : "Test of Normality (Shapiro-Wilk)"
               },
               "title" : "Assumption Checks"
            },
            "descriptives" : {
               "descriptivesPlots" : {
                  "collection" : [
                     {
                        "convertible" : true,
                        "custom" : {
                           "height" : "plotHeight",
                           "width" : "plotWidth"
                        },
                        "data" : "resources/0/_40.png",
                        "height" : 300,
                        "status" : "complete",
                        "title" : "Level_paranormal_beliefs_PRE - Level_paranormal_beliefs_POST",
                        "width" : 350
                     },
                     {
                        "convertible" : true,
                        "custom" : {
                           "height" : "plotHeight",
                           "width" : "plotWidth"
                        },
                        "data" : "resources/0/_41.png",
                        "height" : 300,
                        "status" : "complete",
                        "title" : "Level_MMSI_R_Pva_PRE - Level_MMSI_R_Pva_POST",
                        "width" : 350
                     },
                     {
                        "convertible" : true,
                        "custom" : {
                           "height" : "plotHeight",
                           "width" : "plotWidth"
                        },
                        "data" : "resources/0/_42.png",
                        "height" : 300,
                        "status" : "complete",
                        "title" : "Level_MMSI_R_Pt_PRE - Level_MMSI_R_Pt_POST",
                        "width" : 350
                     },
                     {
                        "convertible" : true,
                        "custom" : {
                           "height" : "plotHeight",
                           "width" : "plotWidth"
                        },
                        "data" : "resources/0/_43.png",
                        "height" : 300,
                        "status" : "complete",
                        "title" : "Level_MMSI_R_Po_PRE - Level_MMSI_R_Po_POST",
                        "width" : 350
                     },
                     {
                        "convertible" : true,
                        "custom" : {
                           "height" : "plotHeight",
                           "width" : "plotWidth"
                        },
                        "data" : "resources/0/_44.png",
                        "height" : 300,
                        "status" : "complete",
                        "title" : "Level_MMSI_R_Pg_PRE - Level_MMSI_R_Pg_POST",
                        "width" : 350
                     },
                     {
                        "convertible" : true,
                        "custom" : {
                           "height" : "plotHeight",
                           "width" : "plotWidth"
                        },
                        "data" : "resources/0/_45.png",
                        "height" : 300,
                        "status" : "complete",
                        "title" : "Level_MMSI_R_Pc_PRE - Level_MMSI_R_Pc_POST",
                        "width" : 350
                     },
                     {
                        "convertible" : true,
                        "custom" : {
                           "height" : "plotHeight",
                           "width" : "plotWidth"
                        },
                        "data" : "resources/0/_46.png",
                        "height" : 300,
                        "status" : "complete",
                        "title" : "Level_MMSI_R_Et_PRE - Level_MMSI_R_ET_POST",
                        "width" : 350
                     },
                     {
                        "convertible" : true,
                        "custom" : {
                           "height" : "plotHeight",
                           "width" : "plotWidth"
                        },
                        "data" : "resources/0/_47.png",
                        "height" : 300,
                        "status" : "complete",
                        "title" : "CAPE42_1_HAL_PRE - CAPE42_1_HAL_POST",
                        "width" : 350
                     },
                     {
                        "convertible" : true,
                        "custom" : {
                           "height" : "plotHeight",
                           "width" : "plotWidth"
                        },
                        "data" : "resources/0/_48.png",
                        "height" : 300,
                        "status" : "complete",
                        "title" : "CAPE42_2_NEGATIVE_PRE - CAPE42_2_NEGATIVE_POST",
                        "width" : 350
                     },
                     {
                        "convertible" : true,
                        "custom" : {
                           "height" : "plotHeight",
                           "width" : "plotWidth"
                        },
                        "data" : "resources/0/_49.png",
                        "height" : 300,
                        "status" : "complete",
                        "title" : "CAPE42_3_DEP_PRE - CAPE42_3_DEP_POST",
                        "width" : 350
                     }
                  ],
                  "title" : "Descriptives Plots"
               },
               "descriptivesTable" : {
                  "data" : [
                     {
                        "N" : 174,
                        "mean" : 12.80459770114940,
                        "sd" : 8.528549918365520,
                        "se" : 0.6465477007677920,
                        "v" : "Level_paranormal_beliefs_PRE"
                     },
                     {
                        "N" : 174,
                        "mean" : 17.55747126436780,
                        "sd" : 6.667549439925550,
                        "se" : 0.5054656185873180,
                        "v" : "Level_paranormal_beliefs_POST"
                     },
                     {
                        "N" : 174,
                        "mean" : 35.3678160919540,
                        "sd" : 11.39781435546260,
                        "se" : 0.8640660763951730,
                        "v" : "Level_MMSI_R_Pva_PRE"
                     },
                     {
                        "N" : 174,
                        "mean" : 36.35632183908050,
                        "sd" : 12.25261752051020,
                        "se" : 0.9288685371019370,
                        "v" : "Level_MMSI_R_Pva_POST"
                     },
                     {
                        "N" : 174,
                        "mean" : 17.34482758620690,
                        "sd" : 5.291125924972560,
                        "se" : 0.4011192212051310,
                        "v" : "Level_MMSI_R_Pt_PRE"
                     },
                     {
                        "N" : 174,
                        "mean" : 21.03448275862070,
                        "sd" : 6.582422337936170,
                        "se" : 0.4990121496399480,
                        "v" : "Level_MMSI_R_Pt_POST"
                     },
                     {
                        "N" : 174,
                        "mean" : 16.92528735632180,
                        "sd" : 4.683033412230840,
                        "se" : 0.3550198467826840,
                        "v" : "Level_MMSI_R_Po_PRE"
                     },
                     {
                        "N" : 174,
                        "mean" : 19.6321839080460,
                        "sd" : 5.453142367201230,
                        "se" : 0.4134016559932480,
                        "v" : "Level_MMSI_R_Po_POST"
                     },
                     {
                        "N" : 174,
                        "mean" : 8.879310344827591,
                        "sd" : 2.609969234688320,
                        "se" : 0.1978612570618340,
                        "v" : "Level_MMSI_R_Pg_PRE"
                     },
                     {
                        "N" : 174,
                        "mean" : 10.61494252873560,
                        "sd" : 3.47509816006850,
                        "se" : 0.2634465116392580,
                        "v" : "Level_MMSI_R_Pg_POST"
                     },
                     {
                        "N" : 174,
                        "mean" : 25.85632183908050,
                        "sd" : 6.977837768173050,
                        "se" : 0.5289885160462970,
                        "v" : "Level_MMSI_R_Pc_PRE"
                     },
                     {
                        "N" : 174,
                        "mean" : 31.31034482758620,
                        "sd" : 7.564459560029380,
                        "se" : 0.5734601993190011,
                        "v" : "Level_MMSI_R_Pc_POST"
                     },
                     {
                        "N" : 174,
                        "mean" : 5.804597701149420,
                        "sd" : 1.873694261089820,
                        "se" : 0.1420443953597210,
                        "v" : "Level_MMSI_R_Et_PRE"
                     },
                     {
                        "N" : 174,
                        "mean" : 9.201149425287360,
                        "sd" : 2.964100980894860,
                        "se" : 0.224707915458670,
                        "v" : "Level_MMSI_R_ET_POST"
                     },
                     {
                        "N" : 174,
                        "mean" : 28.4482758620690,
                        "sd" : 5.005796918624670,
                        "se" : 0.3794884850562670,
                        "v" : "CAPE42_1_HAL_PRE"
                     },
                     {
                        "N" : 174,
                        "mean" : 31.88505747126440,
                        "sd" : 5.757980714121260,
                        "se" : 0.4365113914340390,
                        "v" : "CAPE42_1_HAL_POST"
                     },
                     {
                        "N" : 174,
                        "mean" : 24.86206896551720,
                        "sd" : 6.839484843178740,
                        "se" : 0.5185000078701369,
                        "v" : "CAPE42_2_NEGATIVE_PRE"
                     },
                     {
                        "N" : 174,
                        "mean" : 24.45977011494250,
                        "sd" : 6.62331596692430,
                        "se" : 0.5021122876530230,
                        "v" : "CAPE42_2_NEGATIVE_POST"
                     },
                     {
                        "N" : 174,
                        "mean" : 14.87931034482760,
                        "sd" : 5.003158261059740,
                        "se" : 0.3792884489425010,
                        "v" : "CAPE42_3_DEP_PRE"
                     },
                     {
                        "N" : 174,
                        "mean" : 24.40804597701150,
                        "sd" : 3.982642060017540,
                        "se" : 0.3019233153974350,
                        "v" : "CAPE42_3_DEP_POST"
                     }
                  ],
                  "schema" : {
                     "fields" : [
                        {
                           "name" : "v",
                           "title" : "",
                           "type" : "string"
                        },
                        {
                           "name" : "N",
                           "type" : "integer"
                        },
                        {
                           "format" : "sf:4;dp:3",
                           "name" : "mean",
                           "title" : "Mean",
                           "type" : "number"
                        },
                        {
                           "format" : "sf:4;dp:3",
                           "name" : "sd",
                           "title" : "SD",
                           "type" : "number"
                        },
                        {
                           "format" : "sf:4;dp:3",
                           "name" : "se",
                           "title" : "SE",
                           "type" : "number"
                        }
                     ]
                  },
                  "title" : "Descriptives"
               },
               "title" : "Descriptives"
            },
            "title" : "Paired Samples T-Test",
            "ttest" : {
               "citation" : [ "JASP Team (2019). JASP (Version 0.11.1) [Computer software]." ],
               "data" : [
                  {
                     ".footnotes" : null,
                     "Statistic" : -14.1705433980380,
                     "d" : -1.074266122650260,
                     "df" : 173,
                     "lowerCIeffectSize" : 0,
                     "lowerCIlocationParameter" : -5.41488668038860,
                     "md" : -4.752873563218390,
                     "p" : 9.383588015577701e-31,
                     "sed" : 0.3354051732325550,
                     "sep" : "-",
                     "test" : "Student",
                     "upperCIeffectSize" : 0,
                     "upperCIlocationParameter" : -4.090860446048180,
                     "v1" : "Level_paranormal_beliefs_PRE",
                     "v2" : "Level_paranormal_beliefs_POST"
                  },
                  {
                     ".footnotes" : null,
                     "Statistic" : 345.50,
                     "d" : -0.9463509316770190,
                     "df" : "",
                     "lowerCIeffectSize" : -0.9621635556733050,
                     "lowerCIlocationParameter" : -5.500053843192570,
                     "md" : -4.99994789971040,
                     "p" : 2.444528124210910e-25,
                     "sed" : "",
                     "sep" : "",
                     "test" : "Wilcoxon",
                     "upperCIeffectSize" : -0.9241852271211930,
                     "upperCIlocationParameter" : -4.000031335793430,
                     "v1" : "",
                     "v2" : ""
                  },
                  {
                     ".footnotes" : null,
                     "Statistic" : -3.013977416016030,
                     "d" : -0.2284890382472750,
                     "df" : 173,
                     "lowerCIeffectSize" : 0,
                     "lowerCIlocationParameter" : -1.635851111978490,
                     "md" : -0.9885057471264370,
                     "p" : 0.002966183814415350,
                     "sed" : 0.3279738401069620,
                     "sep" : "-",
                     "test" : "Student",
                     "upperCIeffectSize" : 0,
                     "upperCIlocationParameter" : -0.3411603822743850,
                     "v1" : "Level_MMSI_R_Pva_PRE",
                     "v2" : "Level_MMSI_R_Pva_POST"
                  },
                  {
                     ".footnotes" : null,
                     "Statistic" : 4503.50,
                     "d" : -0.1490788852149270,
                     "df" : "",
                     "lowerCIeffectSize" : -0.3255318598217970,
                     "lowerCIlocationParameter" : -1.500044461517010,
                     "md" : -0.500039286382050,
                     "p" : 0.1179696192528940,
                     "sed" : "",
                     "sep" : "",
                     "test" : "Wilcoxon",
                     "upperCIeffectSize" : 0.03740834280811430,
                     "upperCIlocationParameter" : 8.587042714129440e-05,
                     "v1" : "",
                     "v2" : ""
                  },
                  {
                     ".footnotes" : null,
                     "Statistic" : -14.38185018940570,
                     "d" : -1.090285249163340,
                     "df" : 173,
                     "lowerCIeffectSize" : 0,
                     "lowerCIlocationParameter" : -4.196025043216210,
                     "md" : -3.689655172413790,
                     "p" : 2.333379467509020e-31,
                     "sed" : 0.256549409416860,
                     "sep" : "-",
                     "test" : "Student",
                     "upperCIeffectSize" : 0,
                     "upperCIlocationParameter" : -3.183285301611370,
                     "v1" : "Level_MMSI_R_Pt_PRE",
                     "v2" : "Level_MMSI_R_Pt_POST"
                  },
                  {
                     ".footnotes" : null,
                     "Statistic" : 360.50,
                     "d" : -0.94471282877080,
                     "df" : "",
                     "lowerCIeffectSize" : -0.9609562066596740,
                     "lowerCIlocationParameter" : -4.000015051917330,
                     "md" : -3.999972388921070,
                     "p" : 1.860062060806670e-25,
                     "sed" : "",
                     "sep" : "",
                     "test" : "Wilcoxon",
                     "upperCIeffectSize" : -0.9219805888826870,
                     "upperCIlocationParameter" : -3.499962047392710,
                     "v1" : "",
                     "v2" : ""
                  },
                  {
                     ".footnotes" : null,
                     "Statistic" : -17.38171077174710,
                     "d" : -1.317704093011580,
                     "df" : 173,
                     "lowerCIeffectSize" : 0,
                     "lowerCIlocationParameter" : -3.014276814568990,
                     "md" : -2.706896551724140,
                     "p" : 8.440847301838451e-40,
                     "sed" : 0.1557324585174920,
                     "sep" : "-",
                     "test" : "Student",
                     "upperCIeffectSize" : 0,
                     "upperCIlocationParameter" : -2.399516288879290,
                     "v1" : "Level_MMSI_R_Po_PRE",
                     "v2" : "Level_MMSI_R_Po_POST"
                  },
                  {
                     ".footnotes" : null,
                     "Statistic" : 87.50,
                     "d" : -0.986242138364780,
                     "df" : "",
                     "lowerCIeffectSize" : -0.9903661443725780,
                     "lowerCIlocationParameter" : -3.000041309180910,
                     "md" : -2.999971561873080,
                     "p" : 2.237581934583970e-27,
                     "sed" : "",
                     "sep" : "",
                     "test" : "Wilcoxon",
                     "upperCIeffectSize" : -0.9803701623087240,
                     "upperCIlocationParameter" : -2.50001688190350,
                     "v1" : "",
                     "v2" : ""
                  },
                  {
                     ".footnotes" : null,
                     "Statistic" : -13.98207739850760,
                     "d" : -1.059978552097740,
                     "df" : 173,
                     "lowerCIeffectSize" : 0,
                     "lowerCIlocationParameter" : -1.980641631241160,
                     "md" : -1.735632183908050,
                     "p" : 3.251360899625100e-30,
                     "sed" : 0.1241326402679840,
                     "sep" : "-",
                     "test" : "Student",
                     "upperCIeffectSize" : 0,
                     "upperCIlocationParameter" : -1.490622736574930,
                     "v1" : "Level_MMSI_R_Pg_PRE",
                     "v2" : "Level_MMSI_R_Pg_POST"
                  },
                  {
                     ".footnotes" : null,
                     "Statistic" : 157.50,
                     "d" : -0.9624329159212880,
                     "df" : "",
                     "lowerCIeffectSize" : -0.9746048951015610,
                     "lowerCIlocationParameter" : -2.500064803317740,
                     "md" : -2.499978493771260,
                     "p" : 8.262255811751810e-22,
                     "sed" : "",
                     "sep" : "",
                     "test" : "Wilcoxon",
                     "upperCIeffectSize" : -0.9445905668564060,
                     "upperCIlocationParameter" : -2.000083588547190,
                     "v1" : "",
                     "v2" : ""
                  },
                  {
                     ".footnotes" : null,
                     "Statistic" : -16.59576689939420,
                     "d" : -1.258121841812230,
                     "df" : 173,
                     "lowerCIeffectSize" : 0,
                     "lowerCIlocationParameter" : -6.102682029735780,
                     "md" : -5.454022988505750,
                     "p" : 1.278999447772630e-37,
                     "sed" : 0.3286394067576850,
                     "sep" : "-",
                     "test" : "Student",
                     "upperCIeffectSize" : 0,
                     "upperCIlocationParameter" : -4.805363947275710,
                     "v1" : "Level_MMSI_R_Pc_PRE",
                     "v2" : "Level_MMSI_R_Pc_POST"
                  },
                  {
                     ".footnotes" : null,
                     "Statistic" : 67,
                     "d" : -0.9898507914867830,
                     "df" : "",
                     "lowerCIeffectSize" : -0.9928733851784650,
                     "lowerCIlocationParameter" : -6.49997533837810,
                     "md" : -5.500072788828440,
                     "p" : 7.447060429180830e-28,
                     "sed" : "",
                     "sep" : "",
                     "test" : "Wilcoxon",
                     "upperCIeffectSize" : -0.9855555243022150,
                     "upperCIlocationParameter" : -4.99998225116740,
                     "v1" : "",
                     "v2" : ""
                  },
                  {
                     ".footnotes" : null,
                     "Statistic" : -24.43484271407410,
                     "d" : -1.852400645669780,
                     "df" : 173,
                     "lowerCIeffectSize" : 0,
                     "lowerCIlocationParameter" : -3.670914711279150,
                     "md" : -3.396551724137930,
                     "p" : 5.538146321502030e-58,
                     "sed" : 0.1390044439361820,
                     "sep" : "-",
                     "test" : "Student",
                     "upperCIeffectSize" : 0,
                     "upperCIlocationParameter" : -3.122188736996710,
                     "v1" : "Level_MMSI_R_Et_PRE",
                     "v2" : "Level_MMSI_R_ET_POST"
                  },
                  {
                     ".footnotes" : null,
                     "Statistic" : 179.50,
                     "d" : -0.9744083262047331,
                     "df" : "",
                     "lowerCIeffectSize" : -0.9818927343700640,
                     "lowerCIlocationParameter" : -4.000032774192560,
                     "md" : -3.999984788219250,
                     "p" : 1.650195626828580e-28,
                     "sed" : "",
                     "sep" : "",
                     "test" : "Wilcoxon",
                     "upperCIeffectSize" : -0.9638867031574850,
                     "upperCIlocationParameter" : -3.500020344634040,
                     "v1" : "",
                     "v2" : ""
                  },
                  {
                     ".footnotes" : null,
                     "Statistic" : -23.02245305688950,
                     "d" : -1.745327662081510,
                     "df" : 173,
                     "lowerCIeffectSize" : 0,
                     "lowerCIlocationParameter" : -3.731425321340670,
                     "md" : -3.43678160919540,
                     "p" : 1.480437111953200e-54,
                     "sed" : 0.1492795576867050,
                     "sep" : "-",
                     "test" : "Student",
                     "upperCIeffectSize" : 0,
                     "upperCIlocationParameter" : -3.142137897050140,
                     "v1" : "CAPE42_1_HAL_PRE",
                     "v2" : "CAPE42_1_HAL_POST"
                  },
                  {
                     ".footnotes" : null,
                     "Statistic" : 0,
                     "d" : -1,
                     "df" : "",
                     "lowerCIeffectSize" : -1,
                     "lowerCIlocationParameter" : -3.500049227344580,
                     "md" : -3.499947754902180,
                     "p" : 8.938259500891710e-30,
                     "sed" : "",
                     "sep" : "",
                     "test" : "Wilcoxon",
                     "upperCIeffectSize" : -1,
                     "upperCIlocationParameter" : -3.000001149431650,
                     "v1" : "",
                     "v2" : ""
                  },
                  {
                     ".footnotes" : null,
                     "Statistic" : 0.6655080323178660,
                     "d" : 0.0504520337286220,
                     "df" : 173,
                     "lowerCIeffectSize" : 0,
                     "lowerCIlocationParameter" : -0.7908436835005240,
                     "md" : 0.4022988505747130,
                     "p" : 0.5066119239172890,
                     "sed" : 0.6044988655862880,
                     "sep" : "-",
                     "test" : "Student",
                     "upperCIeffectSize" : 0,
                     "upperCIlocationParameter" : 1.595441384649950,
                     "v1" : "CAPE42_2_NEGATIVE_PRE",
                     "v2" : "CAPE42_2_NEGATIVE_POST"
                  },
                  {
                     ".footnotes" : null,
                     "Statistic" : 6438.50,
                     "d" : 0.03821656050955410,
                     "df" : "",
                     "lowerCIeffectSize" : -0.1411507702847770,
                     "lowerCIlocationParameter" : -1.000021670582090,
                     "md" : 0.4999881611787590,
                     "p" : 0.6779496514447310,
                     "sed" : "",
                     "sep" : "",
                     "test" : "Wilcoxon",
                     "upperCIeffectSize" : 0.2151545927854970,
                     "upperCIlocationParameter" : 1.500073339199510,
                     "v1" : "",
                     "v2" : ""
                  },
                  {
                     ".footnotes" : null,
                     "Statistic" : -22.7359792437870,
                     "d" : -1.723610138356550,
                     "df" : 173,
                     "lowerCIeffectSize" : 0,
                     "lowerCIlocationParameter" : -10.3559507288340,
                     "md" : -9.528735632183910,
                     "p" : 7.564645007507780e-54,
                     "sed" : 0.4191038147075980,
                     "sep" : "-",
                     "test" : "Student",
                     "upperCIeffectSize" : 0,
                     "upperCIlocationParameter" : -8.701520535533829,
                     "v1" : "CAPE42_3_DEP_PRE",
                     "v2" : "CAPE42_3_DEP_POST"
                  },
                  {
                     ".footnotes" : null,
                     "Statistic" : 50,
                     "d" : -0.9933559231944720,
                     "df" : "",
                     "lowerCIeffectSize" : -0.9952835536275960,
                     "lowerCIlocationParameter" : -10.00001974928170,
                     "md" : -9.499981815875721,
                     "p" : 8.592371009659000e-30,
                     "sed" : "",
                     "sep" : "",
                     "test" : "Wilcoxon",
                     "upperCIeffectSize" : -0.9906441566391290,
                     "upperCIlocationParameter" : -8.499961064720109,
                     "v1" : "",
                     "v2" : ""
                  }
               ],
               "footnotes" : [
                  {
                     "cols" : null,
                     "row" : null,
                     "symbol" : "<em>Note.</em>",
                     "text" : "For the Student t-test, \n  \t               effect size is given by Cohen's <em>d</em>; for the Wilcoxon test, \n  \t               effect size is given by the matched rank biserial correlation."
                  }
               ],
               "schema" : {
                  "fields" : [
                     {
                        "name" : "v1",
                        "title" : "",
                        "type" : "string"
                     },
                     {
                        "name" : "sep",
                        "title" : "",
                        "type" : "separator"
                     },
                     {
                        "name" : "v2",
                        "title" : "",
                        "type" : "string"
                     },
                     {
                        "name" : "test",
                        "title" : "Test",
                        "type" : "string"
                     },
                     {
                        "format" : "sf:4;dp:3",
                        "name" : "Statistic",
                        "type" : "number"
                     },
                     {
                        "name" : "df",
                        "type" : "integer"
                     },
                     {
                        "format" : "dp:3;p:.001",
                        "name" : "p",
                        "type" : "number"
                     },
                     {
                        "format" : "sf:4;dp:3",
                        "name" : "d",
                        "title" : "Effect Size",
                        "type" : "number"
                     }
                  ]
               },
               "title" : "Paired Samples T-Test"
            }
         },
         "rfile" : "",
         "status" : "complete",
         "title" : "Paired Samples T-Test",
         "titleDef" : "Paired Samples T-Test",
         "userdata" : null,
         "version" : "0.11.1"
      },
      {
         "id" : 1,
         "module" : "T-Tests",
         "name" : "TTestBayesianPairedSamples",
         "options" : {
            "bayesFactorType" : "BF10",
            "defaultStandardizedEffectSize" : "cauchy",
            "descriptives" : false,
            "descriptivesPlots" : true,
            "descriptivesPlotsCredibleInterval" : 0.950,
            "dienesEffectSize" : "uniform",
            "effectSize" : "standardized",
            "effectSizeStandardized" : "default",
            "halfNormalDienesStd" : 0.7070,
            "hypothesis" : "groupsNotEqual",
            "informativeCauchyLocation" : 0.0,
            "informativeCauchyScale" : 0.7070,
            "informativeNormalMean" : 0.0,
            "informativeNormalStd" : 0.7070,
            "informativeStandardizedEffectSize" : "cauchy",
            "informativeTDf" : 1.0,
            "informativeTLocation" : 0.0,
            "informativeTScale" : 0.7070,
            "missingValues" : "excludeAnalysisByAnalysis",
            "normalDienesMean" : 0.7070,
            "normalDienesStd" : 0.7070,
            "pairs" : [
               [ "Level_paranormal_beliefs_PRE", "Level_paranormal_beliefs_POST" ],
               [ "Level_MMSI_R_Pva_PRE", "Level_MMSI_R_Pva_POST" ],
               [ "Level_MMSI_R_Pt_PRE", "Level_MMSI_R_Pt_POST" ],
               [ "Level_MMSI_R_Po_PRE", "Level_MMSI_R_Po_POST" ],
               [ "Level_MMSI_R_Pg_PRE", "Level_MMSI_R_Pg_POST" ],
               [ "Level_MMSI_R_Pc_PRE", "Level_MMSI_R_Pc_POST" ],
               [ "Level_MMSI_R_Et_PRE", "Level_MMSI_R_ET_POST" ],
               [ "CAPE42_1_HAL_PRE", "CAPE42_1_HAL_POST" ],
               [ "CAPE42_2_NEGATIVE_PRE", "CAPE42_2_NEGATIVE_POST" ],
               [ "CAPE42_3_DEP_PRE", "CAPE42_3_DEP_POST" ]
            ],
            "plotBayesFactorRobustness" : false,
            "plotBayesFactorRobustnessAdditionalInfo" : true,
            "plotHeight" : 340,
            "plotPriorAndPosterior" : true,
            "plotPriorAndPosteriorAdditionalInfo" : true,
            "plotSequentialAnalysis" : false,
            "plotSequentialAnalysisRobustness" : false,
            "plotWidth" : 420,
            "priorWidth" : 0.7070,
            "uniformDienesLowerBound" : 0.7070,
            "uniformDienesUpperBound" : 0.7070
         },
         "progress" : null,
         "results" : {
            ".meta" : [
               {
                  "meta" : [
                     {
                        "name" : "ttestContainer_ttestTable",
                        "type" : "table"
                     },
                     {
                        "meta" : [
                           {
                              "meta" : [
                                 {
                                    "name" : "ttestContainer_inferentialPlots_Level_paranormal_beliefs_PRE - Level_paranormal_beliefs_POST_plotPriorAndPosterior",
                                    "type" : "image"
                                 }
                              ],
                              "name" : "ttestContainer_inferentialPlots_Level_paranormal_beliefs_PRE - Level_paranormal_beliefs_POST",
                              "type" : "collection"
                           },
                           {
                              "meta" : [
                                 {
                                    "name" : "ttestContainer_inferentialPlots_Level_MMSI_R_Pva_PRE - Level_MMSI_R_Pva_POST_plotPriorAndPosterior",
                                    "type" : "image"
                                 }
                              ],
                              "name" : "ttestContainer_inferentialPlots_Level_MMSI_R_Pva_PRE - Level_MMSI_R_Pva_POST",
                              "type" : "collection"
                           },
                           {
                              "meta" : [
                                 {
                                    "name" : "ttestContainer_inferentialPlots_Level_MMSI_R_Pt_PRE - Level_MMSI_R_Pt_POST_plotPriorAndPosterior",
                                    "type" : "image"
                                 }
                              ],
                              "name" : "ttestContainer_inferentialPlots_Level_MMSI_R_Pt_PRE - Level_MMSI_R_Pt_POST",
                              "type" : "collection"
                           },
                           {
                              "meta" : [
                                 {
                                    "name" : "ttestContainer_inferentialPlots_Level_MMSI_R_Po_PRE - Level_MMSI_R_Po_POST_plotPriorAndPosterior",
                                    "type" : "image"
                                 }
                              ],
                              "name" : "ttestContainer_inferentialPlots_Level_MMSI_R_Po_PRE - Level_MMSI_R_Po_POST",
                              "type" : "collection"
                           },
                           {
                              "meta" : [
                                 {
                                    "name" : "ttestContainer_inferentialPlots_Level_MMSI_R_Pg_PRE - Level_MMSI_R_Pg_POST_plotPriorAndPosterior",
                                    "type" : "image"
                                 }
                              ],
                              "name" : "ttestContainer_inferentialPlots_Level_MMSI_R_Pg_PRE - Level_MMSI_R_Pg_POST",
                              "type" : "collection"
                           },
                           {
                              "meta" : [
                                 {
                                    "name" : "ttestContainer_inferentialPlots_Level_MMSI_R_Pc_PRE - Level_MMSI_R_Pc_POST_plotPriorAndPosterior",
                                    "type" : "image"
                                 }
                              ],
                              "name" : "ttestContainer_inferentialPlots_Level_MMSI_R_Pc_PRE - Level_MMSI_R_Pc_POST",
                              "type" : "collection"
                           },
                           {
                              "meta" : [
                                 {
                                    "name" : "ttestContainer_inferentialPlots_Level_MMSI_R_Et_PRE - Level_MMSI_R_ET_POST_plotPriorAndPosterior",
                                    "type" : "image"
                                 }
                              ],
                              "name" : "ttestContainer_inferentialPlots_Level_MMSI_R_Et_PRE - Level_MMSI_R_ET_POST",
                              "type" : "collection"
                           },
                           {
                              "meta" : [
                                 {
                                    "name" : "ttestContainer_inferentialPlots_CAPE42_1_HAL_PRE - CAPE42_1_HAL_POST_plotPriorAndPosterior",
                                    "type" : "image"
                                 }
                              ],
                              "name" : "ttestContainer_inferentialPlots_CAPE42_1_HAL_PRE - CAPE42_1_HAL_POST",
                              "type" : "collection"
                           },
                           {
                              "meta" : [
                                 {
                                    "name" : "ttestContainer_inferentialPlots_CAPE42_2_NEGATIVE_PRE - CAPE42_2_NEGATIVE_POST_plotPriorAndPosterior",
                                    "type" : "image"
                                 }
                              ],
                              "name" : "ttestContainer_inferentialPlots_CAPE42_2_NEGATIVE_PRE - CAPE42_2_NEGATIVE_POST",
                              "type" : "collection"
                           },
                           {
                              "meta" : [
                                 {
                                    "name" : "ttestContainer_inferentialPlots_CAPE42_3_DEP_PRE - CAPE42_3_DEP_POST_plotPriorAndPosterior",
                                    "type" : "image"
                                 }
                              ],
                              "name" : "ttestContainer_inferentialPlots_CAPE42_3_DEP_PRE - CAPE42_3_DEP_POST",
                              "type" : "collection"
                           }
                        ],
                        "name" : "ttestContainer_inferentialPlots",
                        "type" : "collection"
                     }
                  ],
                  "name" : "ttestContainer",
                  "type" : "collection"
               },
               {
                  "meta" : [
                     {
                        "meta" : [
                           {
                              "name" : "descriptivesContainer_plots_Level_paranormal_beliefs_PRE - Level_paranormal_beliefs_POST",
                              "type" : "image"
                           },
                           {
                              "name" : "descriptivesContainer_plots_Level_MMSI_R_Pva_PRE - Level_MMSI_R_Pva_POST",
                              "type" : "image"
                           },
                           {
                              "name" : "descriptivesContainer_plots_Level_MMSI_R_Pt_PRE - Level_MMSI_R_Pt_POST",
                              "type" : "image"
                           },
                           {
                              "name" : "descriptivesContainer_plots_Level_MMSI_R_Po_PRE - Level_MMSI_R_Po_POST",
                              "type" : "image"
                           },
                           {
                              "name" : "descriptivesContainer_plots_Level_MMSI_R_Pg_PRE - Level_MMSI_R_Pg_POST",
                              "type" : "image"
                           },
                           {
                              "name" : "descriptivesContainer_plots_Level_MMSI_R_Pc_PRE - Level_MMSI_R_Pc_POST",
                              "type" : "image"
                           },
                           {
                              "name" : "descriptivesContainer_plots_Level_MMSI_R_Et_PRE - Level_MMSI_R_ET_POST",
                              "type" : "image"
                           },
                           {
                              "name" : "descriptivesContainer_plots_CAPE42_1_HAL_PRE - CAPE42_1_HAL_POST",
                              "type" : "image"
                           },
                           {
                              "name" : "descriptivesContainer_plots_CAPE42_2_NEGATIVE_PRE - CAPE42_2_NEGATIVE_POST",
                              "type" : "image"
                           },
                           {
                              "name" : "descriptivesContainer_plots_CAPE42_3_DEP_PRE - CAPE42_3_DEP_POST",
                              "type" : "image"
                           }
                        ],
                        "name" : "descriptivesContainer_plots",
                        "type" : "collection"
                     }
                  ],
                  "name" : "descriptivesContainer",
                  "type" : "collection"
               }
            ],
            "citation" : [ "JASP Team (2019). JASP (Version 0.11.1) [Computer software]." ],
            "descriptivesContainer" : {
               "collection" : {
                  "descriptivesContainer_plots" : {
                     "collection" : {
                        "descriptivesContainer_plots_CAPE42_1_HAL_PRE - CAPE42_1_HAL_POST" : {
                           "aspectRatio" : 0.0,
                           "convertible" : true,
                           "data" : "resources/1/_13.png",
                           "height" : 400,
                           "name" : "descriptivesContainer_plots_CAPE42_1_HAL_PRE - CAPE42_1_HAL_POST",
                           "status" : "complete",
                           "title" : "CAPE42_1_HAL_PRE - CAPE42_1_HAL_POST",
                           "width" : 530
                        },
                        "descriptivesContainer_plots_CAPE42_2_NEGATIVE_PRE - CAPE42_2_NEGATIVE_POST" : {
                           "aspectRatio" : 0.0,
                           "convertible" : true,
                           "data" : "resources/1/_14.png",
                           "height" : 400,
                           "name" : "descriptivesContainer_plots_CAPE42_2_NEGATIVE_PRE - CAPE42_2_NEGATIVE_POST",
                           "status" : "complete",
                           "title" : "CAPE42_2_NEGATIVE_PRE - CAPE42_2_NEGATIVE_POST",
                           "width" : 530
                        },
                        "descriptivesContainer_plots_CAPE42_3_DEP_PRE - CAPE42_3_DEP_POST" : {
                           "aspectRatio" : 0.0,
                           "convertible" : true,
                           "data" : "resources/1/_15.png",
                           "height" : 400,
                           "name" : "descriptivesContainer_plots_CAPE42_3_DEP_PRE - CAPE42_3_DEP_POST",
                           "status" : "complete",
                           "title" : "CAPE42_3_DEP_PRE - CAPE42_3_DEP_POST",
                           "width" : 530
                        },
                        "descriptivesContainer_plots_Level_MMSI_R_Et_PRE - Level_MMSI_R_ET_POST" : {
                           "aspectRatio" : 0.0,
                           "convertible" : true,
                           "data" : "resources/1/_12.png",
                           "height" : 400,
                           "name" : "descriptivesContainer_plots_Level_MMSI_R_Et_PRE - Level_MMSI_R_ET_POST",
                           "status" : "complete",
                           "title" : "Level_MMSI_R_Et_PRE - Level_MMSI_R_ET_POST",
                           "width" : 530
                        },
                        "descriptivesContainer_plots_Level_MMSI_R_Pc_PRE - Level_MMSI_R_Pc_POST" : {
                           "aspectRatio" : 0.0,
                           "convertible" : true,
                           "data" : "resources/1/_11.png",
                           "height" : 400,
                           "name" : "descriptivesContainer_plots_Level_MMSI_R_Pc_PRE - Level_MMSI_R_Pc_POST",
                           "status" : "complete",
                           "title" : "Level_MMSI_R_Pc_PRE - Level_MMSI_R_Pc_POST",
                           "width" : 530
                        },
                        "descriptivesContainer_plots_Level_MMSI_R_Pg_PRE - Level_MMSI_R_Pg_POST" : {
                           "aspectRatio" : 0.0,
                           "convertible" : true,
                           "data" : "resources/1/_10.png",
                           "height" : 400,
                           "name" : "descriptivesContainer_plots_Level_MMSI_R_Pg_PRE - Level_MMSI_R_Pg_POST",
                           "status" : "complete",
                           "title" : "Level_MMSI_R_Pg_PRE - Level_MMSI_R_Pg_POST",
                           "width" : 530
                        },
                        "descriptivesContainer_plots_Level_MMSI_R_Po_PRE - Level_MMSI_R_Po_POST" : {
                           "aspectRatio" : 0.0,
                           "convertible" : true,
                           "data" : "resources/1/_9.png",
                           "height" : 400,
                           "name" : "descriptivesContainer_plots_Level_MMSI_R_Po_PRE - Level_MMSI_R_Po_POST",
                           "status" : "complete",
                           "title" : "Level_MMSI_R_Po_PRE - Level_MMSI_R_Po_POST",
                           "width" : 530
                        },
                        "descriptivesContainer_plots_Level_MMSI_R_Pt_PRE - Level_MMSI_R_Pt_POST" : {
                           "aspectRatio" : 0.0,
                           "convertible" : true,
                           "data" : "resources/1/_8.png",
                           "height" : 400,
                           "name" : "descriptivesContainer_plots_Level_MMSI_R_Pt_PRE - Level_MMSI_R_Pt_POST",
                           "status" : "complete",
                           "title" : "Level_MMSI_R_Pt_PRE - Level_MMSI_R_Pt_POST",
                           "width" : 530
                        },
                        "descriptivesContainer_plots_Level_MMSI_R_Pva_PRE - Level_MMSI_R_Pva_POST" : {
                           "aspectRatio" : 0.0,
                           "convertible" : true,
                           "data" : "resources/1/_7.png",
                           "height" : 400,
                           "name" : "descriptivesContainer_plots_Level_MMSI_R_Pva_PRE - Level_MMSI_R_Pva_POST",
                           "status" : "complete",
                           "title" : "Level_MMSI_R_Pva_PRE - Level_MMSI_R_Pva_POST",
                           "width" : 530
                        },
                        "descriptivesContainer_plots_Level_paranormal_beliefs_PRE - Level_paranormal_beliefs_POST" : {
                           "aspectRatio" : 0.0,
                           "convertible" : true,
                           "data" : "resources/1/_6.png",
                           "height" : 400,
                           "name" : "descriptivesContainer_plots_Level_paranormal_beliefs_PRE - Level_paranormal_beliefs_POST",
                           "status" : "complete",
                           "title" : "Level_paranormal_beliefs_PRE - Level_paranormal_beliefs_POST",
                           "width" : 530
                        }
                     },
                     "name" : "descriptivesContainer_plots",
                     "title" : "Descriptives Plots"
                  }
               },
               "name" : "descriptivesContainer",
               "title" : ""
            },
            "name" : "",
            "title" : "Bayesian Paired Samples T-Test",
            "ttestContainer" : {
               "collection" : {
                  "ttestContainer_inferentialPlots" : {
                     "collection" : {
                        "ttestContainer_inferentialPlots_CAPE42_1_HAL_PRE - CAPE42_1_HAL_POST" : {
                           "collection" : {
                              "ttestContainer_inferentialPlots_CAPE42_1_HAL_PRE - CAPE42_1_HAL_POST_plotPriorAndPosterior" : {
                                 "aspectRatio" : 0.0,
                                 "convertible" : true,
                                 "data" : "resources/1/_23.png",
                                 "height" : 400,
                                 "name" : "ttestContainer_inferentialPlots_CAPE42_1_HAL_PRE - CAPE42_1_HAL_POST_plotPriorAndPosterior",
                                 "status" : "complete",
                                 "title" : "Prior and Posterior",
                                 "width" : 530
                              }
                           },
                           "name" : "ttestContainer_inferentialPlots_CAPE42_1_HAL_PRE - CAPE42_1_HAL_POST",
                           "title" : "CAPE42_1_HAL_PRE - CAPE42_1_HAL_POST"
                        },
                        "ttestContainer_inferentialPlots_CAPE42_2_NEGATIVE_PRE - CAPE42_2_NEGATIVE_POST" : {
                           "collection" : {
                              "ttestContainer_inferentialPlots_CAPE42_2_NEGATIVE_PRE - CAPE42_2_NEGATIVE_POST_plotPriorAndPosterior" : {
                                 "aspectRatio" : 0.0,
                                 "convertible" : true,
                                 "data" : "resources/1/_24.png",
                                 "height" : 400,
                                 "name" : "ttestContainer_inferentialPlots_CAPE42_2_NEGATIVE_PRE - CAPE42_2_NEGATIVE_POST_plotPriorAndPosterior",
                                 "status" : "complete",
                                 "title" : "Prior and Posterior",
                                 "width" : 530
                              }
                           },
                           "name" : "ttestContainer_inferentialPlots_CAPE42_2_NEGATIVE_PRE - CAPE42_2_NEGATIVE_POST",
                           "title" : "CAPE42_2_NEGATIVE_PRE - CAPE42_2_NEGATIVE_POST"
                        },
                        "ttestContainer_inferentialPlots_CAPE42_3_DEP_PRE - CAPE42_3_DEP_POST" : {
                           "collection" : {
                              "ttestContainer_inferentialPlots_CAPE42_3_DEP_PRE - CAPE42_3_DEP_POST_plotPriorAndPosterior" : {
                                 "aspectRatio" : 0.0,
                                 "convertible" : true,
                                 "data" : "resources/1/_25.png",
                                 "height" : 400,
                                 "name" : "ttestContainer_inferentialPlots_CAPE42_3_DEP_PRE - CAPE42_3_DEP_POST_plotPriorAndPosterior",
                                 "status" : "complete",
                                 "title" : "Prior and Posterior",
                                 "width" : 530
                              }
                           },
                           "name" : "ttestContainer_inferentialPlots_CAPE42_3_DEP_PRE - CAPE42_3_DEP_POST",
                           "title" : "CAPE42_3_DEP_PRE - CAPE42_3_DEP_POST"
                        },
                        "ttestContainer_inferentialPlots_Level_MMSI_R_Et_PRE - Level_MMSI_R_ET_POST" : {
                           "collection" : {
                              "ttestContainer_inferentialPlots_Level_MMSI_R_Et_PRE - Level_MMSI_R_ET_POST_plotPriorAndPosterior" : {
                                 "aspectRatio" : 0.0,
                                 "convertible" : true,
                                 "data" : "resources/1/_22.png",
                                 "height" : 400,
                                 "name" : "ttestContainer_inferentialPlots_Level_MMSI_R_Et_PRE - Level_MMSI_R_ET_POST_plotPriorAndPosterior",
                                 "status" : "complete",
                                 "title" : "Prior and Posterior",
                                 "width" : 530
                              }
                           },
                           "name" : "ttestContainer_inferentialPlots_Level_MMSI_R_Et_PRE - Level_MMSI_R_ET_POST",
                           "title" : "Level_MMSI_R_Et_PRE - Level_MMSI_R_ET_POST"
                        },
                        "ttestContainer_inferentialPlots_Level_MMSI_R_Pc_PRE - Level_MMSI_R_Pc_POST" : {
                           "collection" : {
                              "ttestContainer_inferentialPlots_Level_MMSI_R_Pc_PRE - Level_MMSI_R_Pc_POST_plotPriorAndPosterior" : {
                                 "aspectRatio" : 0.0,
                                 "convertible" : true,
                                 "data" : "resources/1/_21.png",
                                 "height" : 400,
                                 "name" : "ttestContainer_inferentialPlots_Level_MMSI_R_Pc_PRE - Level_MMSI_R_Pc_POST_plotPriorAndPosterior",
                                 "status" : "complete",
                                 "title" : "Prior and Posterior",
                                 "width" : 530
                              }
                           },
                           "name" : "ttestContainer_inferentialPlots_Level_MMSI_R_Pc_PRE - Level_MMSI_R_Pc_POST",
                           "title" : "Level_MMSI_R_Pc_PRE - Level_MMSI_R_Pc_POST"
                        },
                        "ttestContainer_inferentialPlots_Level_MMSI_R_Pg_PRE - Level_MMSI_R_Pg_POST" : {
                           "collection" : {
                              "ttestContainer_inferentialPlots_Level_MMSI_R_Pg_PRE - Level_MMSI_R_Pg_POST_plotPriorAndPosterior" : {
                                 "aspectRatio" : 0.0,
                                 "convertible" : true,
                                 "data" : "resources/1/_20.png",
                                 "height" : 400,
                                 "name" : "ttestContainer_inferentialPlots_Level_MMSI_R_Pg_PRE - Level_MMSI_R_Pg_POST_plotPriorAndPosterior",
                                 "status" : "complete",
                                 "title" : "Prior and Posterior",
                                 "width" : 530
                              }
                           },
                           "name" : "ttestContainer_inferentialPlots_Level_MMSI_R_Pg_PRE - Level_MMSI_R_Pg_POST",
                           "title" : "Level_MMSI_R_Pg_PRE - Level_MMSI_R_Pg_POST"
                        },
                        "ttestContainer_inferentialPlots_Level_MMSI_R_Po_PRE - Level_MMSI_R_Po_POST" : {
                           "collection" : {
                              "ttestContainer_inferentialPlots_Level_MMSI_R_Po_PRE - Level_MMSI_R_Po_POST_plotPriorAndPosterior" : {
                                 "aspectRatio" : 0.0,
                                 "convertible" : true,
                                 "data" : "resources/1/_19.png",
                                 "height" : 400,
                                 "name" : "ttestContainer_inferentialPlots_Level_MMSI_R_Po_PRE - Level_MMSI_R_Po_POST_plotPriorAndPosterior",
                                 "status" : "complete",
                                 "title" : "Prior and Posterior",
                                 "width" : 530
                              }
                           },
                           "name" : "ttestContainer_inferentialPlots_Level_MMSI_R_Po_PRE - Level_MMSI_R_Po_POST",
                           "title" : "Level_MMSI_R_Po_PRE - Level_MMSI_R_Po_POST"
                        },
                        "ttestContainer_inferentialPlots_Level_MMSI_R_Pt_PRE - Level_MMSI_R_Pt_POST" : {
                           "collection" : {
                              "ttestContainer_inferentialPlots_Level_MMSI_R_Pt_PRE - Level_MMSI_R_Pt_POST_plotPriorAndPosterior" : {
                                 "aspectRatio" : 0.0,
                                 "convertible" : true,
                                 "data" : "resources/1/_18.png",
                                 "height" : 400,
                                 "name" : "ttestContainer_inferentialPlots_Level_MMSI_R_Pt_PRE - Level_MMSI_R_Pt_POST_plotPriorAndPosterior",
                                 "status" : "complete",
                                 "title" : "Prior and Posterior",
                                 "width" : 530
                              }
                           },
                           "name" : "ttestContainer_inferentialPlots_Level_MMSI_R_Pt_PRE - Level_MMSI_R_Pt_POST",
                           "title" : "Level_MMSI_R_Pt_PRE - Level_MMSI_R_Pt_POST"
                        },
                        "ttestContainer_inferentialPlots_Level_MMSI_R_Pva_PRE - Level_MMSI_R_Pva_POST" : {
                           "collection" : {
                              "ttestContainer_inferentialPlots_Level_MMSI_R_Pva_PRE - Level_MMSI_R_Pva_POST_plotPriorAndPosterior" : {
                                 "aspectRatio" : 0.0,
                                 "convertible" : true,
                                 "data" : "resources/1/_17.png",
                                 "height" : 400,
                                 "name" : "ttestContainer_inferentialPlots_Level_MMSI_R_Pva_PRE - Level_MMSI_R_Pva_POST_plotPriorAndPosterior",
                                 "status" : "complete",
                                 "title" : "Prior and Posterior",
                                 "width" : 530
                              }
                           },
                           "name" : "ttestContainer_inferentialPlots_Level_MMSI_R_Pva_PRE - Level_MMSI_R_Pva_POST",
                           "title" : "Level_MMSI_R_Pva_PRE - Level_MMSI_R_Pva_POST"
                        },
                        "ttestContainer_inferentialPlots_Level_paranormal_beliefs_PRE - Level_paranormal_beliefs_POST" : {
                           "collection" : {
                              "ttestContainer_inferentialPlots_Level_paranormal_beliefs_PRE - Level_paranormal_beliefs_POST_plotPriorAndPosterior" : {
                                 "aspectRatio" : 0.0,
                                 "convertible" : true,
                                 "data" : "resources/1/_16.png",
                                 "height" : 400,
                                 "name" : "ttestContainer_inferentialPlots_Level_paranormal_beliefs_PRE - Level_paranormal_beliefs_POST_plotPriorAndPosterior",
                                 "status" : "complete",
                                 "title" : "Prior and Posterior",
                                 "width" : 530
                              }
                           },
                           "name" : "ttestContainer_inferentialPlots_Level_paranormal_beliefs_PRE - Level_paranormal_beliefs_POST",
                           "title" : "Level_paranormal_beliefs_PRE - Level_paranormal_beliefs_POST"
                        }
                     },
                     "name" : "ttestContainer_inferentialPlots",
                     "title" : "Inferential Plots"
                  },
                  "ttestContainer_ttestTable" : {
                     "casesAcrossColumns" : false,
                     "citation" : [
                        "Morey, R. D., & Rouder, J. N. (2015). BayesFactor (Version 0.9.11-3)[Computer software].",
                        "Rouder, J. N., Speckman, P. L., Sun, D., Morey, R. D., & Iverson, G. (2009). Bayesian t tests for accepting and rejecting the null hypothesis. Psychonomic Bulletin & Review, 16, 225–237."
                     ],
                     "data" : [
                        {
                           "BF" : 3.357381573264861e+27,
                           "error" : 2.347310664242969e-33,
                           "separator" : "-",
                           "variable1" : "Level_paranormal_beliefs_PRE",
                           "variable2" : "Level_paranormal_beliefs_POST"
                        },
                        {
                           "BF" : 6.603070911066881,
                           "error" : 2.767597115947148e-05,
                           "separator" : "-",
                           "variable1" : "Level_MMSI_R_Pva_PRE",
                           "variable2" : "Level_MMSI_R_Pva_POST"
                        },
                        {
                           "BF" : 1.324251872579034e+28,
                           "error" : 2.528758808350571e-32,
                           "separator" : "-",
                           "variable1" : "Level_MMSI_R_Pt_PRE",
                           "variable2" : "Level_MMSI_R_Pt_POST"
                        },
                        {
                           "BF" : 2.865445313030160e+36,
                           "error" : 5.450277018442512e-42,
                           "separator" : "-",
                           "variable1" : "Level_MMSI_R_Po_PRE",
                           "variable2" : "Level_MMSI_R_Po_POST"
                        },
                        {
                           "BF" : 9.861089325391766e+26,
                           "error" : 6.556305334162971e-33,
                           "separator" : "-",
                           "variable1" : "Level_MMSI_R_Pg_PRE",
                           "variable2" : "Level_MMSI_R_Pg_POST"
                        },
                        {
                           "BF" : 2.006453517303289e+34,
                           "error" : 8.932915317295728e-40,
                           "separator" : "-",
                           "variable1" : "Level_MMSI_R_Pc_PRE",
                           "variable2" : "Level_MMSI_R_Pc_POST"
                        },
                        {
                           "BF" : 2.867389668223681e+54,
                           "error" : 2.822130321263946e-60,
                           "separator" : "-",
                           "variable1" : "Level_MMSI_R_Et_PRE",
                           "variable2" : "Level_MMSI_R_ET_POST"
                        },
                        {
                           "BF" : 1.152164979253973e+51,
                           "error" : 8.477792119532170e-57,
                           "separator" : "-",
                           "variable1" : "CAPE42_1_HAL_PRE",
                           "variable2" : "CAPE42_1_HAL_POST"
                        },
                        {
                           "BF" : 0.1051705481732919,
                           "error" : 0.001866890747425970,
                           "separator" : "-",
                           "variable1" : "CAPE42_2_NEGATIVE_PRE",
                           "variable2" : "CAPE42_2_NEGATIVE_POST"
                        },
                        {
                           "BF" : 2.289260627592384e+50,
                           "error" : 4.117543131424677e-56,
                           "separator" : "-",
                           "variable1" : "CAPE42_3_DEP_PRE",
                           "variable2" : "CAPE42_3_DEP_POST"
                        }
                     ],
                     "footnotes" : [],
                     "name" : "ttestContainer_ttestTable",
                     "overTitle" : false,
                     "schema" : {
                        "fields" : [
                           {
                              "name" : "variable1",
                              "title" : "",
                              "type" : "string"
                           },
                           {
                              "name" : "separator",
                              "title" : "",
                              "type" : "string"
                           },
                           {
                              "name" : "variable2",
                              "title" : "",
                              "type" : "string"
                           },
                           {
                              "format" : "sf:4;dp:3",
                              "name" : "BF",
                              "title" : "BF₁₀",
                              "type" : "number"
                           },
                           {
                              "format" : "sf:4;dp:3",
                              "name" : "error",
                              "title" : "error %",
                              "type" : "number"
                           }
                        ]
                     },
                     "status" : "complete",
                     "title" : "Bayesian Paired Samples T-Test"
                  }
               },
               "name" : "ttestContainer",
               "title" : ""
            }
         },
         "rfile" : "",
         "status" : "complete",
         "title" : "Bayesian Paired Samples T-Test",
         "titleDef" : "Bayesian Paired Samples T-Test",
         "userdata" : null,
         "version" : "0.11.1"
      }
   ],
   "meta" : {
      "notes" : {
         "first" : {
            "format" : "markdown",
            "text" : "\n",
            "visible" : false
         }
      },
      "title" : "Results"
   }
}
