# Supplementary material for: Pseudoscientific beliefs and psychopathological risks increase after COVID-19 social quarantine
Source: Global Health. 2020 Jul 30;16:72. doi: 10.1186/s12992-020-00603-1 (PMC7391050; doi:10.1186/s12992-020-00603-1)
Supplement: Supplementary file 2 — Additional file 2. [file 12992_2020_603_MOESM2_ESM.jasp › META-INF/MANIFEST.MF]

Manifest-Version: 1.0
Created-By: JASP 0.11.1
Data-Archive-Version: 1.0.2
JASP-Archive-Version: 3.1
