# Supplementary material for: Pseudoscientific beliefs and psychopathological risks increase after COVID-19 social quarantine
Source: Global Health. 2020 Jul 30;16:72. doi: 10.1186/s12992-020-00603-1 (PMC7391050; doi:10.1186/s12992-020-00603-1)
Supplement: Supplementary file 2 — Additional file 2. [file 12992_2020_603_MOESM2_ESM.jasp › metadata.json]

{
   "computedColumns" : [],
   "dataFilePath" : "D:/Alex/Escritorio/Papers/Papers IN PREPARATION/Paper_ COVID-19/Data_1.sav",
   "dataFileReadOnly" : false,
   "dataFileTimestamp" : 1589353505,
   "dataSet" : {
      "columnCount" : 23,
      "emptyValuesMap" : {},
      "fields" : [
         {
            "measureType" : "Continuous",
            "name" : "Age",
            "type" : "number"
         },
         {
            "measureType" : "Nominal",
            "name" : "Sex",
            "type" : "integer"
         },
         {
            "measureType" : "Nominal",
            "name" : "Spanish_City",
            "type" : "integer"
         },
         {
            "measureType" : "Continuous",
            "name" : "Level_paranormal_beliefs_PRE",
            "type" : "number"
         },
         {
            "measureType" : "Continuous",
            "name" : "Level_paranormal_beliefs_POST",
            "type" : "number"
         },
         {
            "measureType" : "Continuous",
            "name" : "Level_MMSI_R_Pva_PRE",
            "type" : "number"
         },
         {
            "measureType" : "Continuous",
            "name" : "Level_MMSI_R_Pva_POST",
            "type" : "number"
         },
         {
            "measureType" : "Continuous",
            "name" : "Level_MMSI_R_Pt_PRE",
            "type" : "number"
         },
         {
            "measureType" : "Continuous",
            "name" : "Level_MMSI_R_Pt_POST",
            "type" : "number"
         },
         {
            "measureType" : "Continuous",
            "name" : "Level_MMSI_R_Po_PRE",
            "type" : "number"
         },
         {
            "measureType" : "Continuous",
            "name" : "Level_MMSI_R_Po_POST",
            "type" : "number"
         },
         {
            "measureType" : "Continuous",
            "name" : "Level_MMSI_R_Pg_PRE",
            "type" : "number"
         },
         {
            "measureType" : "Continuous",
            "name" : "Level_MMSI_R_Pg_POST",
            "type" : "number"
         },
         {
            "measureType" : "Continuous",
            "name" : "Level_MMSI_R_Pc_PRE",
            "type" : "number"
         },
         {
            "measureType" : "Continuous",
            "name" : "Level_MMSI_R_Pc_POST",
            "type" : "number"
         },
         {
            "measureType" : "Continuous",
            "name" : "Level_MMSI_R_Et_PRE",
            "type" : "number"
         },
         {
            "measureType" : "Continuous",
            "name" : "Level_MMSI_R_ET_POST",
            "type" : "number"
         },
         {
            "measureType" : "Continuous",
            "name" : "CAPE42_1_HAL_PRE",
            "type" : "number"
         },
         {
            "measureType" : "Continuous",
            "name" : "CAPE42_1_HAL_POST",
            "type" : "number"
         },
         {
            "measureType" : "Continuous",
            "name" : "CAPE42_2_NEGATIVE_PRE",
            "type" : "number"
         },
         {
            "measureType" : "Continuous",
            "name" : "CAPE42_2_NEGATIVE_POST",
            "type" : "number"
         },
         {
            "measureType" : "Continuous",
            "name" : "CAPE42_3_DEP_PRE",
            "type" : "number"
         },
         {
            "measureType" : "Continuous",
            "name" : "CAPE42_3_DEP_POST",
            "type" : "number"
         }
      ],
      "filterVector" : [
         true,
         true,
         true,
         true,
         true,
         true,
         true,
         true,
         true,
         true,
         true,
         true,
         true,
         true,
         true,
         true,
         true,
         true,
         true,
         true,
         true,
         true,
         true,
         true,
         true,
         true,
         true,
         true,
         true,
         true,
         true,
         true,
         true,
         true,
         true,
         true,
         true,
         true,
         true,
         true,
         true,
         true,
         true,
         true,
         true,
         true,
         true,
         true,
         true,
         true,
         true,
         true,
         true,
         true,
         true,
         true,
         true,
         true,
         true,
         true,
         true,
         true,
         true,
         true,
         true,
         true,
         true,
         true,
         true,
         true,
         true,
         true,
         true,
         true,
         true,
         true,
         true,
         true,
         true,
         true,
         true,
         true,
         true,
         true,
         true,
         true,
         true,
         true,
         true,
         true,
         true,
         true,
         true,
         true,
         true,
         true,
         true,
         true,
         true,
         true,
         true,
         true,
         true,
         true,
         true,
         true,
         true,
         true,
         true,
         true,
         true,
         true,
         true,
         true,
         true,
         true,
         true,
         true,
         true,
         true,
         true,
         true,
         true,
         true,
         true,
         true,
         true,
         true,
         true,
         true,
         true,
         true,
         true,
         true,
         true,
         true,
         true,
         true,
         true,
         true,
         true,
         true,
         true,
         true,
         true,
         true,
         true,
         true,
         true,
         true,
         true,
         true,
         true,
         true,
         true,
         true,
         true,
         true,
         true,
         true,
         true,
         true,
         true,
         true,
         true,
         true,
         true,
         true,
         true,
         true,
         true,
         true,
         true,
         true
      ],
      "rowCount" : 174
   },
   "emptyValues" : [ "NaN", "nan", ".", "NA" ],
   "filterConstructorJSON" : "{\"formulas\":[]}",
   "filterData" : "# Add filters using R syntax here, see question mark for help.\n\ngeneratedFilter # by default: pass the non-R filter(s)"
}
