# Supplementary material for: Pseudoscientific beliefs and psychopathological risks increase after COVID-19 social quarantine
Source: Global Health. 2020 Jul 30;16:72. doi: 10.1186/s12992-020-00603-1 (PMC7391050; doi:10.1186/s12992-020-00603-1)
Supplement: Supplementary file 2 — Additional file 2. [file 12992_2020_603_MOESM2_ESM.jasp › resources/1/jaspResults.json]

{
   "citations" : [ "JASP Team (2019). JASP (Version 0.11.1) [Computer software]." ],
   "data" : {
      "descriptivesContainer" : {
         "citations" : [],
         "data" : {
            "plots" : {
               "citations" : [],
               "data" : {
                  "CAPE42_1_HAL_PRE - CAPE42_1_HAL_POST" : {
                     "aspectRatio" : 0.0,
                     "citations" : [],
                     "environmentName" : "plot_13",
                     "error" : false,
                     "errorMessage" : "",
                     "filePathPng" : "resources/1/_13.png",
                     "height" : 400,
                     "messages" : [],
                     "name" : "CAPE42_1_HAL_PRE - CAPE42_1_HAL_POST",
                     "optionMustBe" : {},
                     "optionMustContain" : {
                        "pairs" : [
                           [ "CAPE42_1_HAL_PRE", "CAPE42_1_HAL_POST" ]
                        ]
                     },
                     "position" : 9999,
                     "status" : "complete",
                     "title" : "CAPE42_1_HAL_PRE - CAPE42_1_HAL_POST",
                     "type" : "plot",
                     "width" : 530
                  },
                  "CAPE42_2_NEGATIVE_PRE - CAPE42_2_NEGATIVE_POST" : {
                     "aspectRatio" : 0.0,
                     "citations" : [],
                     "environmentName" : "plot_14",
                     "error" : false,
                     "errorMessage" : "",
                     "filePathPng" : "resources/1/_14.png",
                     "height" : 400,
                     "messages" : [],
                     "name" : "CAPE42_2_NEGATIVE_PRE - CAPE42_2_NEGATIVE_POST",
                     "optionMustBe" : {},
                     "optionMustContain" : {
                        "pairs" : [
                           [ "CAPE42_2_NEGATIVE_PRE", "CAPE42_2_NEGATIVE_POST" ]
                        ]
                     },
                     "position" : 9999,
                     "status" : "complete",
                     "title" : "CAPE42_2_NEGATIVE_PRE - CAPE42_2_NEGATIVE_POST",
                     "type" : "plot",
                     "width" : 530
                  },
                  "CAPE42_3_DEP_PRE - CAPE42_3_DEP_POST" : {
                     "aspectRatio" : 0.0,
                     "citations" : [],
                     "environmentName" : "plot_15",
                     "error" : false,
                     "errorMessage" : "",
                     "filePathPng" : "resources/1/_15.png",
                     "height" : 400,
                     "messages" : [],
                     "name" : "CAPE42_3_DEP_PRE - CAPE42_3_DEP_POST",
                     "optionMustBe" : {},
                     "optionMustContain" : {
                        "pairs" : [
                           [ "CAPE42_3_DEP_PRE", "CAPE42_3_DEP_POST" ]
                        ]
                     },
                     "position" : 9999,
                     "status" : "complete",
                     "title" : "CAPE42_3_DEP_PRE - CAPE42_3_DEP_POST",
                     "type" : "plot",
                     "width" : 530
                  },
                  "Level_MMSI_R_Et_PRE - Level_MMSI_R_ET_POST" : {
                     "aspectRatio" : 0.0,
                     "citations" : [],
                     "environmentName" : "plot_12",
                     "error" : false,
                     "errorMessage" : "",
                     "filePathPng" : "resources/1/_12.png",
                     "height" : 400,
                     "messages" : [],
                     "name" : "Level_MMSI_R_Et_PRE - Level_MMSI_R_ET_POST",
                     "optionMustBe" : {},
                     "optionMustContain" : {
                        "pairs" : [
                           [ "Level_MMSI_R_Et_PRE", "Level_MMSI_R_ET_POST" ]
                        ]
                     },
                     "position" : 9999,
                     "status" : "complete",
                     "title" : "Level_MMSI_R_Et_PRE - Level_MMSI_R_ET_POST",
                     "type" : "plot",
                     "width" : 530
                  },
                  "Level_MMSI_R_Pc_PRE - Level_MMSI_R_Pc_POST" : {
                     "aspectRatio" : 0.0,
                     "citations" : [],
                     "environmentName" : "plot_11",
                     "error" : false,
                     "errorMessage" : "",
                     "filePathPng" : "resources/1/_11.png",
                     "height" : 400,
                     "messages" : [],
                     "name" : "Level_MMSI_R_Pc_PRE - Level_MMSI_R_Pc_POST",
                     "optionMustBe" : {},
                     "optionMustContain" : {
                        "pairs" : [
                           [ "Level_MMSI_R_Pc_PRE", "Level_MMSI_R_Pc_POST" ]
                        ]
                     },
                     "position" : 9999,
                     "status" : "complete",
                     "title" : "Level_MMSI_R_Pc_PRE - Level_MMSI_R_Pc_POST",
                     "type" : "plot",
                     "width" : 530
                  },
                  "Level_MMSI_R_Pg_PRE - Level_MMSI_R_Pg_POST" : {
                     "aspectRatio" : 0.0,
                     "citations" : [],
                     "environmentName" : "plot_10",
                     "error" : false,
                     "errorMessage" : "",
                     "filePathPng" : "resources/1/_10.png",
                     "height" : 400,
                     "messages" : [],
                     "name" : "Level_MMSI_R_Pg_PRE - Level_MMSI_R_Pg_POST",
                     "optionMustBe" : {},
                     "optionMustContain" : {
                        "pairs" : [
                           [ "Level_MMSI_R_Pg_PRE", "Level_MMSI_R_Pg_POST" ]
                        ]
                     },
                     "position" : 9999,
                     "status" : "complete",
                     "title" : "Level_MMSI_R_Pg_PRE - Level_MMSI_R_Pg_POST",
                     "type" : "plot",
                     "width" : 530
                  },
                  "Level_MMSI_R_Po_PRE - Level_MMSI_R_Po_POST" : {
                     "aspectRatio" : 0.0,
                     "citations" : [],
                     "environmentName" : "plot_9",
                     "error" : false,
                     "errorMessage" : "",
                     "filePathPng" : "resources/1/_9.png",
                     "height" : 400,
                     "messages" : [],
                     "name" : "Level_MMSI_R_Po_PRE - Level_MMSI_R_Po_POST",
                     "optionMustBe" : {},
                     "optionMustContain" : {
                        "pairs" : [
                           [ "Level_MMSI_R_Po_PRE", "Level_MMSI_R_Po_POST" ]
                        ]
                     },
                     "position" : 9999,
                     "status" : "complete",
                     "title" : "Level_MMSI_R_Po_PRE - Level_MMSI_R_Po_POST",
                     "type" : "plot",
                     "width" : 530
                  },
                  "Level_MMSI_R_Pt_PRE - Level_MMSI_R_Pt_POST" : {
                     "aspectRatio" : 0.0,
                     "citations" : [],
                     "environmentName" : "plot_8",
                     "error" : false,
                     "errorMessage" : "",
                     "filePathPng" : "resources/1/_8.png",
                     "height" : 400,
                     "messages" : [],
                     "name" : "Level_MMSI_R_Pt_PRE - Level_MMSI_R_Pt_POST",
                     "optionMustBe" : {},
                     "optionMustContain" : {
                        "pairs" : [
                           [ "Level_MMSI_R_Pt_PRE", "Level_MMSI_R_Pt_POST" ]
                        ]
                     },
                     "position" : 9999,
                     "status" : "complete",
                     "title" : "Level_MMSI_R_Pt_PRE - Level_MMSI_R_Pt_POST",
                     "type" : "plot",
                     "width" : 530
                  },
                  "Level_MMSI_R_Pva_PRE - Level_MMSI_R_Pva_POST" : {
                     "aspectRatio" : 0.0,
                     "citations" : [],
                     "environmentName" : "plot_7",
                     "error" : false,
                     "errorMessage" : "",
                     "filePathPng" : "resources/1/_7.png",
                     "height" : 400,
                     "messages" : [],
                     "name" : "Level_MMSI_R_Pva_PRE - Level_MMSI_R_Pva_POST",
                     "optionMustBe" : {},
                     "optionMustContain" : {
                        "pairs" : [
                           [ "Level_MMSI_R_Pva_PRE", "Level_MMSI_R_Pva_POST" ]
                        ]
                     },
                     "position" : 9999,
                     "status" : "complete",
                     "title" : "Level_MMSI_R_Pva_PRE - Level_MMSI_R_Pva_POST",
                     "type" : "plot",
                     "width" : 530
                  },
                  "Level_paranormal_beliefs_PRE - Level_paranormal_beliefs_POST" : {
                     "aspectRatio" : 0.0,
                     "citations" : [],
                     "environmentName" : "plot_6",
                     "error" : false,
                     "errorMessage" : "",
                     "filePathPng" : "resources/1/_6.png",
                     "height" : 400,
                     "messages" : [],
                     "name" : "Level_paranormal_beliefs_PRE - Level_paranormal_beliefs_POST",
                     "optionMustBe" : {},
                     "optionMustContain" : {
                        "pairs" : [
                           [ "Level_paranormal_beliefs_PRE", "Level_paranormal_beliefs_POST" ]
                        ]
                     },
                     "position" : 9999,
                     "status" : "complete",
                     "title" : "Level_paranormal_beliefs_PRE - Level_paranormal_beliefs_POST",
                     "type" : "plot",
                     "width" : 530
                  }
               },
               "data_order" : {
                  "CAPE42_1_HAL_PRE - CAPE42_1_HAL_POST" : 7,
                  "CAPE42_2_NEGATIVE_PRE - CAPE42_2_NEGATIVE_POST" : 8,
                  "CAPE42_3_DEP_PRE - CAPE42_3_DEP_POST" : 9,
                  "Level_MMSI_R_Et_PRE - Level_MMSI_R_ET_POST" : 6,
                  "Level_MMSI_R_Pc_PRE - Level_MMSI_R_Pc_POST" : 5,
                  "Level_MMSI_R_Pg_PRE - Level_MMSI_R_Pg_POST" : 4,
                  "Level_MMSI_R_Po_PRE - Level_MMSI_R_Po_POST" : 3,
                  "Level_MMSI_R_Pt_PRE - Level_MMSI_R_Pt_POST" : 2,
                  "Level_MMSI_R_Pva_PRE - Level_MMSI_R_Pva_POST" : 1,
                  "Level_paranormal_beliefs_PRE - Level_paranormal_beliefs_POST" : 0
               },
               "error" : false,
               "errorMessage" : "",
               "messages" : [],
               "name" : "plots",
               "optionMustBe" : {
                  "descriptivesPlots" : true
               },
               "optionMustContain" : {},
               "order_increment" : 10,
               "position" : 2,
               "title" : "Descriptives Plots",
               "type" : "container"
            }
         },
         "data_order" : {
            "plots" : 0
         },
         "error" : false,
         "errorMessage" : "",
         "messages" : [],
         "name" : "descriptivesContainer",
         "optionMustBe" : {
            "descriptivesPlots" : true,
            "descriptivesPlotsCredibleInterval" : 0.950,
            "groupingVariable" : null,
            "missingValues" : "excludeAnalysisByAnalysis"
         },
         "optionMustContain" : {},
         "order_increment" : 1,
         "position" : 2,
         "title" : "",
         "type" : "container"
      },
      "stateVariables" : {
         "citations" : [],
         "environmentName" : "state_17",
         "error" : false,
         "errorMessage" : "",
         "messages" : [],
         "name" : "stateVariables",
         "optionMustBe" : {
            "missingValues" : "excludeAnalysisByAnalysis"
         },
         "optionMustContain" : {},
         "position" : 9999,
         "title" : "",
         "type" : "state"
      },
      "ttestContainer" : {
         "citations" : [],
         "data" : {
            "inferentialPlots" : {
               "citations" : [],
               "data" : {
                  "CAPE42_1_HAL_PRE - CAPE42_1_HAL_POST" : {
                     "citations" : [],
                     "data" : {
                        "plotPriorAndPosterior" : {
                           "aspectRatio" : 0.0,
                           "citations" : [],
                           "environmentName" : "plot_23",
                           "error" : false,
                           "errorMessage" : "",
                           "filePathPng" : "resources/1/_23.png",
                           "height" : 400,
                           "messages" : [],
                           "name" : "plotPriorAndPosterior",
                           "optionMustBe" : {
                              "plotPriorAndPosterior" : true,
                              "plotPriorAndPosteriorAdditionalInfo" : true
                           },
                           "optionMustContain" : {},
                           "position" : 1,
                           "status" : "complete",
                           "title" : "Prior and Posterior",
                           "type" : "plot",
                           "width" : 530
                        }
                     },
                     "data_order" : {
                        "plotPriorAndPosterior" : 0
                     },
                     "error" : false,
                     "errorMessage" : "",
                     "messages" : [],
                     "name" : "CAPE42_1_HAL_PRE - CAPE42_1_HAL_POST",
                     "optionMustBe" : {},
                     "optionMustContain" : {
                        "pairs" : [
                           [ "CAPE42_1_HAL_PRE", "CAPE42_1_HAL_POST" ]
                        ]
                     },
                     "order_increment" : 1,
                     "position" : 9999,
                     "title" : "CAPE42_1_HAL_PRE - CAPE42_1_HAL_POST",
                     "type" : "container"
                  },
                  "CAPE42_2_NEGATIVE_PRE - CAPE42_2_NEGATIVE_POST" : {
                     "citations" : [],
                     "data" : {
                        "plotPriorAndPosterior" : {
                           "aspectRatio" : 0.0,
                           "citations" : [],
                           "environmentName" : "plot_24",
                           "error" : false,
                           "errorMessage" : "",
                           "filePathPng" : "resources/1/_24.png",
                           "height" : 400,
                           "messages" : [],
                           "name" : "plotPriorAndPosterior",
                           "optionMustBe" : {
                              "plotPriorAndPosterior" : true,
                              "plotPriorAndPosteriorAdditionalInfo" : true
                           },
                           "optionMustContain" : {},
                           "position" : 1,
                           "status" : "complete",
                           "title" : "Prior and Posterior",
                           "type" : "plot",
                           "width" : 530
                        }
                     },
                     "data_order" : {
                        "plotPriorAndPosterior" : 0
                     },
                     "error" : false,
                     "errorMessage" : "",
                     "messages" : [],
                     "name" : "CAPE42_2_NEGATIVE_PRE - CAPE42_2_NEGATIVE_POST",
                     "optionMustBe" : {},
                     "optionMustContain" : {
                        "pairs" : [
                           [ "CAPE42_2_NEGATIVE_PRE", "CAPE42_2_NEGATIVE_POST" ]
                        ]
                     },
                     "order_increment" : 1,
                     "position" : 9999,
                     "title" : "CAPE42_2_NEGATIVE_PRE - CAPE42_2_NEGATIVE_POST",
                     "type" : "container"
                  },
                  "CAPE42_3_DEP_PRE - CAPE42_3_DEP_POST" : {
                     "citations" : [],
                     "data" : {
                        "plotPriorAndPosterior" : {
                           "aspectRatio" : 0.0,
                           "citations" : [],
                           "environmentName" : "plot_25",
                           "error" : false,
                           "errorMessage" : "",
                           "filePathPng" : "resources/1/_25.png",
                           "height" : 400,
                           "messages" : [],
                           "name" : "plotPriorAndPosterior",
                           "optionMustBe" : {
                              "plotPriorAndPosterior" : true,
                              "plotPriorAndPosteriorAdditionalInfo" : true
                           },
                           "optionMustContain" : {},
                           "position" : 1,
                           "status" : "complete",
                           "title" : "Prior and Posterior",
                           "type" : "plot",
                           "width" : 530
                        }
                     },
                     "data_order" : {
                        "plotPriorAndPosterior" : 0
                     },
                     "error" : false,
                     "errorMessage" : "",
                     "messages" : [],
                     "name" : "CAPE42_3_DEP_PRE - CAPE42_3_DEP_POST",
                     "optionMustBe" : {},
                     "optionMustContain" : {
                        "pairs" : [
                           [ "CAPE42_3_DEP_PRE", "CAPE42_3_DEP_POST" ]
                        ]
                     },
                     "order_increment" : 1,
                     "position" : 9999,
                     "title" : "CAPE42_3_DEP_PRE - CAPE42_3_DEP_POST",
                     "type" : "container"
                  },
                  "Level_MMSI_R_Et_PRE - Level_MMSI_R_ET_POST" : {
                     "citations" : [],
                     "data" : {
                        "plotPriorAndPosterior" : {
                           "aspectRatio" : 0.0,
                           "citations" : [],
                           "environmentName" : "plot_22",
                           "error" : false,
                           "errorMessage" : "",
                           "filePathPng" : "resources/1/_22.png",
                           "height" : 400,
                           "messages" : [],
                           "name" : "plotPriorAndPosterior",
                           "optionMustBe" : {
                              "plotPriorAndPosterior" : true,
                              "plotPriorAndPosteriorAdditionalInfo" : true
                           },
                           "optionMustContain" : {},
                           "position" : 1,
                           "status" : "complete",
                           "title" : "Prior and Posterior",
                           "type" : "plot",
                           "width" : 530
                        }
                     },
                     "data_order" : {
                        "plotPriorAndPosterior" : 0
                     },
                     "error" : false,
                     "errorMessage" : "",
                     "messages" : [],
                     "name" : "Level_MMSI_R_Et_PRE - Level_MMSI_R_ET_POST",
                     "optionMustBe" : {},
                     "optionMustContain" : {
                        "pairs" : [
                           [ "Level_MMSI_R_Et_PRE", "Level_MMSI_R_ET_POST" ]
                        ]
                     },
                     "order_increment" : 1,
                     "position" : 9999,
                     "title" : "Level_MMSI_R_Et_PRE - Level_MMSI_R_ET_POST",
                     "type" : "container"
                  },
                  "Level_MMSI_R_Pc_PRE - Level_MMSI_R_Pc_POST" : {
                     "citations" : [],
                     "data" : {
                        "plotPriorAndPosterior" : {
                           "aspectRatio" : 0.0,
                           "citations" : [],
                           "environmentName" : "plot_21",
                           "error" : false,
                           "errorMessage" : "",
                           "filePathPng" : "resources/1/_21.png",
                           "height" : 400,
                           "messages" : [],
                           "name" : "plotPriorAndPosterior",
                           "optionMustBe" : {
                              "plotPriorAndPosterior" : true,
                              "plotPriorAndPosteriorAdditionalInfo" : true
                           },
                           "optionMustContain" : {},
                           "position" : 1,
                           "status" : "complete",
                           "title" : "Prior and Posterior",
                           "type" : "plot",
                           "width" : 530
                        }
                     },
                     "data_order" : {
                        "plotPriorAndPosterior" : 0
                     },
                     "error" : false,
                     "errorMessage" : "",
                     "messages" : [],
                     "name" : "Level_MMSI_R_Pc_PRE - Level_MMSI_R_Pc_POST",
                     "optionMustBe" : {},
                     "optionMustContain" : {
                        "pairs" : [
                           [ "Level_MMSI_R_Pc_PRE", "Level_MMSI_R_Pc_POST" ]
                        ]
                     },
                     "order_increment" : 1,
                     "position" : 9999,
                     "title" : "Level_MMSI_R_Pc_PRE - Level_MMSI_R_Pc_POST",
                     "type" : "container"
                  },
                  "Level_MMSI_R_Pg_PRE - Level_MMSI_R_Pg_POST" : {
                     "citations" : [],
                     "data" : {
                        "plotPriorAndPosterior" : {
                           "aspectRatio" : 0.0,
                           "citations" : [],
                           "environmentName" : "plot_20",
                           "error" : false,
                           "errorMessage" : "",
                           "filePathPng" : "resources/1/_20.png",
                           "height" : 400,
                           "messages" : [],
                           "name" : "plotPriorAndPosterior",
                           "optionMustBe" : {
                              "plotPriorAndPosterior" : true,
                              "plotPriorAndPosteriorAdditionalInfo" : true
                           },
                           "optionMustContain" : {},
                           "position" : 1,
                           "status" : "complete",
                           "title" : "Prior and Posterior",
                           "type" : "plot",
                           "width" : 530
                        }
                     },
                     "data_order" : {
                        "plotPriorAndPosterior" : 0
                     },
                     "error" : false,
                     "errorMessage" : "",
                     "messages" : [],
                     "name" : "Level_MMSI_R_Pg_PRE - Level_MMSI_R_Pg_POST",
                     "optionMustBe" : {},
                     "optionMustContain" : {
                        "pairs" : [
                           [ "Level_MMSI_R_Pg_PRE", "Level_MMSI_R_Pg_POST" ]
                        ]
                     },
                     "order_increment" : 1,
                     "position" : 9999,
                     "title" : "Level_MMSI_R_Pg_PRE - Level_MMSI_R_Pg_POST",
                     "type" : "container"
                  },
                  "Level_MMSI_R_Po_PRE - Level_MMSI_R_Po_POST" : {
                     "citations" : [],
                     "data" : {
                        "plotPriorAndPosterior" : {
                           "aspectRatio" : 0.0,
                           "citations" : [],
                           "environmentName" : "plot_19",
                           "error" : false,
                           "errorMessage" : "",
                           "filePathPng" : "resources/1/_19.png",
                           "height" : 400,
                           "messages" : [],
                           "name" : "plotPriorAndPosterior",
                           "optionMustBe" : {
                              "plotPriorAndPosterior" : true,
                              "plotPriorAndPosteriorAdditionalInfo" : true
                           },
                           "optionMustContain" : {},
                           "position" : 1,
                           "status" : "complete",
                           "title" : "Prior and Posterior",
                           "type" : "plot",
                           "width" : 530
                        }
                     },
                     "data_order" : {
                        "plotPriorAndPosterior" : 0
                     },
                     "error" : false,
                     "errorMessage" : "",
                     "messages" : [],
                     "name" : "Level_MMSI_R_Po_PRE - Level_MMSI_R_Po_POST",
                     "optionMustBe" : {},
                     "optionMustContain" : {
                        "pairs" : [
                           [ "Level_MMSI_R_Po_PRE", "Level_MMSI_R_Po_POST" ]
                        ]
                     },
                     "order_increment" : 1,
                     "position" : 9999,
                     "title" : "Level_MMSI_R_Po_PRE - Level_MMSI_R_Po_POST",
                     "type" : "container"
                  },
                  "Level_MMSI_R_Pt_PRE - Level_MMSI_R_Pt_POST" : {
                     "citations" : [],
                     "data" : {
                        "plotPriorAndPosterior" : {
                           "aspectRatio" : 0.0,
                           "citations" : [],
                           "environmentName" : "plot_18",
                           "error" : false,
                           "errorMessage" : "",
                           "filePathPng" : "resources/1/_18.png",
                           "height" : 400,
                           "messages" : [],
                           "name" : "plotPriorAndPosterior",
                           "optionMustBe" : {
                              "plotPriorAndPosterior" : true,
                              "plotPriorAndPosteriorAdditionalInfo" : true
                           },
                           "optionMustContain" : {},
                           "position" : 1,
                           "status" : "complete",
                           "title" : "Prior and Posterior",
                           "type" : "plot",
                           "width" : 530
                        }
                     },
                     "data_order" : {
                        "plotPriorAndPosterior" : 0
                     },
                     "error" : false,
                     "errorMessage" : "",
                     "messages" : [],
                     "name" : "Level_MMSI_R_Pt_PRE - Level_MMSI_R_Pt_POST",
                     "optionMustBe" : {},
                     "optionMustContain" : {
                        "pairs" : [
                           [ "Level_MMSI_R_Pt_PRE", "Level_MMSI_R_Pt_POST" ]
                        ]
                     },
                     "order_increment" : 1,
                     "position" : 9999,
                     "title" : "Level_MMSI_R_Pt_PRE - Level_MMSI_R_Pt_POST",
                     "type" : "container"
                  },
                  "Level_MMSI_R_Pva_PRE - Level_MMSI_R_Pva_POST" : {
                     "citations" : [],
                     "data" : {
                        "plotPriorAndPosterior" : {
                           "aspectRatio" : 0.0,
                           "citations" : [],
                           "environmentName" : "plot_17",
                           "error" : false,
                           "errorMessage" : "",
                           "filePathPng" : "resources/1/_17.png",
                           "height" : 400,
                           "messages" : [],
                           "name" : "plotPriorAndPosterior",
                           "optionMustBe" : {
                              "plotPriorAndPosterior" : true,
                              "plotPriorAndPosteriorAdditionalInfo" : true
                           },
                           "optionMustContain" : {},
                           "position" : 1,
                           "status" : "complete",
                           "title" : "Prior and Posterior",
                           "type" : "plot",
                           "width" : 530
                        }
                     },
                     "data_order" : {
                        "plotPriorAndPosterior" : 0
                     },
                     "error" : false,
                     "errorMessage" : "",
                     "messages" : [],
                     "name" : "Level_MMSI_R_Pva_PRE - Level_MMSI_R_Pva_POST",
                     "optionMustBe" : {},
                     "optionMustContain" : {
                        "pairs" : [
                           [ "Level_MMSI_R_Pva_PRE", "Level_MMSI_R_Pva_POST" ]
                        ]
                     },
                     "order_increment" : 1,
                     "position" : 9999,
                     "title" : "Level_MMSI_R_Pva_PRE - Level_MMSI_R_Pva_POST",
                     "type" : "container"
                  },
                  "Level_paranormal_beliefs_PRE - Level_paranormal_beliefs_POST" : {
                     "citations" : [],
                     "data" : {
                        "plotPriorAndPosterior" : {
                           "aspectRatio" : 0.0,
                           "citations" : [],
                           "environmentName" : "plot_16",
                           "error" : false,
                           "errorMessage" : "",
                           "filePathPng" : "resources/1/_16.png",
                           "height" : 400,
                           "messages" : [],
                           "name" : "plotPriorAndPosterior",
                           "optionMustBe" : {
                              "plotPriorAndPosterior" : true,
                              "plotPriorAndPosteriorAdditionalInfo" : true
                           },
                           "optionMustContain" : {},
                           "position" : 1,
                           "status" : "complete",
                           "title" : "Prior and Posterior",
                           "type" : "plot",
                           "width" : 530
                        }
                     },
                     "data_order" : {
                        "plotPriorAndPosterior" : 0
                     },
                     "error" : false,
                     "errorMessage" : "",
                     "messages" : [],
                     "name" : "Level_paranormal_beliefs_PRE - Level_paranormal_beliefs_POST",
                     "optionMustBe" : {},
                     "optionMustContain" : {
                        "pairs" : [
                           [ "Level_paranormal_beliefs_PRE", "Level_paranormal_beliefs_POST" ]
                        ]
                     },
                     "order_increment" : 1,
                     "position" : 9999,
                     "title" : "Level_paranormal_beliefs_PRE - Level_paranormal_beliefs_POST",
                     "type" : "container"
                  }
               },
               "data_order" : {
                  "CAPE42_1_HAL_PRE - CAPE42_1_HAL_POST" : 7,
                  "CAPE42_2_NEGATIVE_PRE - CAPE42_2_NEGATIVE_POST" : 8,
                  "CAPE42_3_DEP_PRE - CAPE42_3_DEP_POST" : 9,
                  "Level_MMSI_R_Et_PRE - Level_MMSI_R_ET_POST" : 6,
                  "Level_MMSI_R_Pc_PRE - Level_MMSI_R_Pc_POST" : 5,
                  "Level_MMSI_R_Pg_PRE - Level_MMSI_R_Pg_POST" : 4,
                  "Level_MMSI_R_Po_PRE - Level_MMSI_R_Po_POST" : 3,
                  "Level_MMSI_R_Pt_PRE - Level_MMSI_R_Pt_POST" : 2,
                  "Level_MMSI_R_Pva_PRE - Level_MMSI_R_Pva_POST" : 1,
                  "Level_paranormal_beliefs_PRE - Level_paranormal_beliefs_POST" : 0
               },
               "error" : false,
               "errorMessage" : "",
               "messages" : [],
               "name" : "inferentialPlots",
               "optionMustBe" : {
                  "hypothesis" : "groupsNotEqual",
                  "testStatistic" : null
               },
               "optionMustContain" : {},
               "order_increment" : 10,
               "position" : 9999,
               "title" : "Inferential Plots",
               "type" : "container"
            },
            "stateTTestResults" : {
               "citations" : [],
               "environmentName" : "state_7",
               "error" : false,
               "errorMessage" : "",
               "messages" : [],
               "name" : "stateTTestResults",
               "optionMustBe" : {},
               "optionMustContain" : {},
               "position" : 9999,
               "title" : "",
               "type" : "state"
            },
            "ttestTable" : {
               "citations" : [
                  "Morey, R. D., & Rouder, J. N. (2015). BayesFactor (Version 0.9.11-3)[Computer software].",
                  "Rouder, J. N., Speckman, P. L., Sun, D., Morey, R. D., & Iverson, G. (2009). Bayesian t tests for accepting and rejecting the null hypothesis. Psychonomic Bulletin & Review, 16, 225–237."
               ],
               "colCombines" : {
                  "citations" : [],
                  "error" : false,
                  "errorMessage" : "",
                  "fields" : {},
                  "listType" : "bool",
                  "messages" : [],
                  "name" : "",
                  "optionMustBe" : {},
                  "optionMustContain" : {},
                  "position" : 9999,
                  "rows" : [],
                  "title" : "",
                  "type" : "list"
               },
               "colFormats" : {
                  "citations" : [],
                  "error" : false,
                  "errorMessage" : "",
                  "fields" : {
                     "BF" : "sf:4;dp:3",
                     "error" : "sf:4;dp:3"
                  },
                  "listType" : "string",
                  "messages" : [],
                  "name" : "",
                  "optionMustBe" : {},
                  "optionMustContain" : {},
                  "position" : 9999,
                  "rows" : [],
                  "title" : "colFormats",
                  "type" : "list"
               },
               "colNames" : {
                  "citations" : [],
                  "error" : false,
                  "errorMessage" : "",
                  "fields" : {},
                  "listType" : "string",
                  "messages" : [],
                  "name" : "",
                  "optionMustBe" : {},
                  "optionMustContain" : {},
                  "position" : 9999,
                  "rows" : [ "variable1", "separator", "variable2", "BF", "error" ],
                  "title" : "colNames",
                  "type" : "list"
               },
               "colOvertitles" : {
                  "citations" : [],
                  "error" : false,
                  "errorMessage" : "",
                  "fields" : {},
                  "listType" : "string",
                  "messages" : [],
                  "name" : "",
                  "optionMustBe" : {},
                  "optionMustContain" : {},
                  "position" : 9999,
                  "rows" : [],
                  "title" : "colOvertitles",
                  "type" : "list"
               },
               "colRowCombinations" : [],
               "colTitles" : {
                  "citations" : [],
                  "error" : false,
                  "errorMessage" : "",
                  "fields" : {
                     "BF" : "BF₁₀",
                     "error" : "error %",
                     "separator" : "",
                     "variable1" : "",
                     "variable2" : ""
                  },
                  "listType" : "string",
                  "messages" : [],
                  "name" : "",
                  "optionMustBe" : {},
                  "optionMustContain" : {},
                  "position" : 9999,
                  "rows" : [],
                  "title" : "colTitles",
                  "type" : "list"
               },
               "colTypes" : {
                  "citations" : [],
                  "error" : false,
                  "errorMessage" : "",
                  "fields" : {
                     "BF" : "number",
                     "error" : "number",
                     "separator" : "string",
                     "variable1" : "string",
                     "variable2" : "string"
                  },
                  "listType" : "string",
                  "messages" : [],
                  "name" : "",
                  "optionMustBe" : {},
                  "optionMustContain" : {},
                  "position" : 9999,
                  "rows" : [],
                  "title" : "colTypes",
                  "type" : "list"
               },
               "data" : [
                  [
                     "Level_paranormal_beliefs_PRE",
                     "Level_MMSI_R_Pva_PRE",
                     "Level_MMSI_R_Pt_PRE",
                     "Level_MMSI_R_Po_PRE",
                     "Level_MMSI_R_Pg_PRE",
                     "Level_MMSI_R_Pc_PRE",
                     "Level_MMSI_R_Et_PRE",
                     "CAPE42_1_HAL_PRE",
                     "CAPE42_2_NEGATIVE_PRE",
                     "CAPE42_3_DEP_PRE"
                  ],
                  [ "-", "-", "-", "-", "-", "-", "-", "-", "-", "-" ],
                  [
                     "Level_paranormal_beliefs_POST",
                     "Level_MMSI_R_Pva_POST",
                     "Level_MMSI_R_Pt_POST",
                     "Level_MMSI_R_Po_POST",
                     "Level_MMSI_R_Pg_POST",
                     "Level_MMSI_R_Pc_POST",
                     "Level_MMSI_R_ET_POST",
                     "CAPE42_1_HAL_POST",
                     "CAPE42_2_NEGATIVE_POST",
                     "CAPE42_3_DEP_POST"
                  ],
                  [
                     3.357381573264861e+027,
                     6.603070911066881,
                     1.324251872579034e+028,
                     2.865445313030160e+036,
                     9.861089325391766e+026,
                     2.006453517303289e+034,
                     2.867389668223681e+054,
                     1.152164979253973e+051,
                     0.1051705481732919,
                     2.289260627592384e+050
                  ],
                  [
                     2.347310664242969e-033,
                     2.767597115947148e-005,
                     2.528758808350571e-032,
                     5.450277018442512e-042,
                     6.556305334162971e-033,
                     8.932915317295728e-040,
                     2.822130321263946e-060,
                     8.477792119532170e-057,
                     0.001866890747425970,
                     4.117543131424677e-056
                  ]
               ],
               "error" : false,
               "errorMessage" : "",
               "expectedColumnCount" : 0,
               "expectedRowCount" : 0,
               "footnotes" : [],
               "messages" : [],
               "name" : "ttestTable",
               "optionMustBe" : {
                  "bayesFactorType" : "BF10",
                  "pairs" : [
                     [ "Level_paranormal_beliefs_PRE", "Level_paranormal_beliefs_POST" ],
                     [ "Level_MMSI_R_Pva_PRE", "Level_MMSI_R_Pva_POST" ],
                     [ "Level_MMSI_R_Pt_PRE", "Level_MMSI_R_Pt_POST" ],
                     [ "Level_MMSI_R_Po_PRE", "Level_MMSI_R_Po_POST" ],
                     [ "Level_MMSI_R_Pg_PRE", "Level_MMSI_R_Pg_POST" ],
                     [ "Level_MMSI_R_Pc_PRE", "Level_MMSI_R_Pc_POST" ],
                     [ "Level_MMSI_R_Et_PRE", "Level_MMSI_R_ET_POST" ],
                     [ "CAPE42_1_HAL_PRE", "CAPE42_1_HAL_POST" ],
                     [ "CAPE42_2_NEGATIVE_PRE", "CAPE42_2_NEGATIVE_POST" ],
                     [ "CAPE42_3_DEP_PRE", "CAPE42_3_DEP_POST" ]
                  ]
               },
               "optionMustContain" : {},
               "position" : 9999,
               "rowNames" : {
                  "citations" : [],
                  "error" : false,
                  "errorMessage" : "",
                  "fields" : {},
                  "listType" : "string",
                  "messages" : [],
                  "name" : "",
                  "optionMustBe" : {},
                  "optionMustContain" : {},
                  "position" : 9999,
                  "rows" : [
                     "Level_paranormal_beliefs_PRE - Level_paranormal_beliefs_POST",
                     "Level_MMSI_R_Pva_PRE - Level_MMSI_R_Pva_POST",
                     "Level_MMSI_R_Pt_PRE - Level_MMSI_R_Pt_POST",
                     "Level_MMSI_R_Po_PRE - Level_MMSI_R_Po_POST",
                     "Level_MMSI_R_Pg_PRE - Level_MMSI_R_Pg_POST",
                     "Level_MMSI_R_Pc_PRE - Level_MMSI_R_Pc_POST",
                     "Level_MMSI_R_Et_PRE - Level_MMSI_R_ET_POST",
                     "CAPE42_1_HAL_PRE - CAPE42_1_HAL_POST",
                     "CAPE42_2_NEGATIVE_PRE - CAPE42_2_NEGATIVE_POST",
                     "CAPE42_3_DEP_PRE - CAPE42_3_DEP_POST"
                  ],
                  "title" : "rowNames",
                  "type" : "list"
               },
               "rowTitles" : {
                  "citations" : [],
                  "error" : false,
                  "errorMessage" : "",
                  "fields" : {},
                  "listType" : "string",
                  "messages" : [],
                  "name" : "",
                  "optionMustBe" : {},
                  "optionMustContain" : {},
                  "position" : 9999,
                  "rows" : [],
                  "title" : "rowTitles",
                  "type" : "list"
               },
               "showSpecifiedColumnsOnly" : false,
               "specifiedColumns" : [ "BF", "error", "separator", "variable1", "variable2" ],
               "status" : "complete",
               "title" : "Bayesian Paired Samples T-Test",
               "transposeTable" : false,
               "transposeWithOvertitle" : false,
               "type" : "table"
            }
         },
         "data_order" : {
            "inferentialPlots" : 2,
            "stateTTestResults" : 1,
            "ttestTable" : 0
         },
         "error" : false,
         "errorMessage" : "",
         "messages" : [],
         "name" : "ttestContainer",
         "optionMustBe" : {
            "effectSizeStandardized" : "default",
            "groupingVariable" : null,
            "hypothesis" : "groupsNotEqual",
            "informativeCauchyLocation" : 0.0,
            "informativeCauchyScale" : 0.7070,
            "informativeNormalMean" : 0.0,
            "informativeNormalStd" : 0.7070,
            "informativeStandardizedEffectSize" : "cauchy",
            "informativeTDf" : 1.0,
            "informativeTLocation" : 0.0,
            "informativeTScale" : 0.7070,
            "missingValues" : "excludeAnalysisByAnalysis",
            "priorWidth" : 0.7070,
            "testStatistic" : null,
            "testValue" : null,
            "wilcoxonSamplesNumber" : null
         },
         "optionMustContain" : {},
         "order_increment" : 3,
         "position" : 1,
         "title" : "",
         "type" : "container"
      }
   },
   "data_order" : {
      "descriptivesContainer" : 2,
      "stateVariables" : 0,
      "ttestContainer" : 1
   },
   "error" : false,
   "errorMessage" : "",
   "messages" : [],
   "name" : "",
   "optionMustBe" : {},
   "optionMustContain" : {},
   "options" : {
      "bayesFactorType" : "BF10",
      "defaultStandardizedEffectSize" : "cauchy",
      "descriptives" : false,
      "descriptivesPlots" : true,
      "descriptivesPlotsCredibleInterval" : 0.950,
      "dienesEffectSize" : "uniform",
      "effectSize" : "standardized",
      "effectSizeStandardized" : "default",
      "halfNormalDienesStd" : 0.7070,
      "hypothesis" : "groupsNotEqual",
      "informativeCauchyLocation" : 0.0,
      "informativeCauchyScale" : 0.7070,
      "informativeNormalMean" : 0.0,
      "informativeNormalStd" : 0.7070,
      "informativeStandardizedEffectSize" : "cauchy",
      "informativeTDf" : 1.0,
      "informativeTLocation" : 0.0,
      "informativeTScale" : 0.7070,
      "missingValues" : "excludeAnalysisByAnalysis",
      "normalDienesMean" : 0.7070,
      "normalDienesStd" : 0.7070,
      "pairs" : [
         [ "Level_paranormal_beliefs_PRE", "Level_paranormal_beliefs_POST" ],
         [ "Level_MMSI_R_Pva_PRE", "Level_MMSI_R_Pva_POST" ],
         [ "Level_MMSI_R_Pt_PRE", "Level_MMSI_R_Pt_POST" ],
         [ "Level_MMSI_R_Po_PRE", "Level_MMSI_R_Po_POST" ],
         [ "Level_MMSI_R_Pg_PRE", "Level_MMSI_R_Pg_POST" ],
         [ "Level_MMSI_R_Pc_PRE", "Level_MMSI_R_Pc_POST" ],
         [ "Level_MMSI_R_Et_PRE", "Level_MMSI_R_ET_POST" ],
         [ "CAPE42_1_HAL_PRE", "CAPE42_1_HAL_POST" ],
         [ "CAPE42_2_NEGATIVE_PRE", "CAPE42_2_NEGATIVE_POST" ],
         [ "CAPE42_3_DEP_PRE", "CAPE42_3_DEP_POST" ]
      ],
      "plotBayesFactorRobustness" : false,
      "plotBayesFactorRobustnessAdditionalInfo" : true,
      "plotHeight" : 340,
      "plotPriorAndPosterior" : true,
      "plotPriorAndPosteriorAdditionalInfo" : true,
      "plotSequentialAnalysis" : false,
      "plotSequentialAnalysisRobustness" : false,
      "plotWidth" : 420,
      "priorWidth" : 0.7070,
      "uniformDienesLowerBound" : 0.7070,
      "uniformDienesUpperBound" : 0.7070
   },
   "order_increment" : 3,
   "position" : 9999,
   "relativePathKeep" : "resources/1/state",
   "title" : "Bayesian Paired Samples T-Test",
   "type" : "results"
}
