# Supplementary material for: Pseudoscientific beliefs and psychopathological risks increase after COVID-19 social quarantine
Source: Global Health. 2020 Jul 30;16:72. doi: 10.1186/s12992-020-00603-1 (PMC7391050; doi:10.1186/s12992-020-00603-1)
Supplement: Supplementary file 2 — Additional file 2. [file 12992_2020_603_MOESM2_ESM.jasp › xdata.json]

{
   "Sex" : {
      "labels" : [
         [ 0, "Woman", true ],
         [ 1, "Man", true ]
      ],
      "orgStringValues" : null
   },
   "Spanish_City" : {
      "labels" : [
         [ 0, "Madrid", true ],
         [ 1, "Barcelona", true ]
      ],
      "orgStringValues" : null
   }
}
